# Supplementary material for: Multivariate optimization and validation of 200 pesticide residues in the banana matrix by GC-MS/MS
Source: Royal Society of Chemistry journal article supplement (doi:10.1039/d4ay00703d), 2024-01-01

## Supplementary Material

### Multivariate optimization and validation of 200 pesticide residues in banana matrix by GC-MS/MS

Tushar Rajaram Ahire,<sup>ab1</sup> Rupal Rajesh Thasale,<sup>a2</sup> Ankita Das,<sup>ac</sup> Nikhil Pradip Kulkarni,<sup>a</sup> Dhyan Mineshkumar Vyas<sup>ab</sup> and Sivaperumal Perumal<sup>\*a3</sup>

<sup>a</sup>Chemical Sciences Division, ICMR- National Institute of Occupational Health, Meghani Nagar, Ahmedabad.

<sup>b</sup>Department of Biochemistry and Forensic Science, Gujarat University, Ahmedabad.

<sup>c</sup>National Forensic Sciences University, Tripura Campus.

\* Corresponding Author- sivaperumal.p@gov.in, sivaperum2003@yahoo.co.in

**Table S1:** Summarization of P-B design table

| Run order | Pt Type | Blocks | (A) | (B) | (C) | (D) | (E) |
|-----------|---------|--------|-----|-----|-----|-----|-----|
| 1         | 1       | 1      | -1  | -1  | +1  | +1  | +1  |
| 2         | 0       | 1      | 0   | 0   | 0   | 0   | 0   |
| 3         | 1       | 1      | -1  | -1  | -1  | -1  | -1  |
| 4         | 1       | 1      | +1  | -1  | +1  | +1  | -1  |
| 5         | 1       | 1      | -1  | -1  | -1  | +1  | +1  |
| 6         | 0       | 1      | 0   | 0   | 0   | 0   | 0   |
| 7         | 1       | 1      | +1  | +1  | -1  | +1  | -1  |
| 8         | 1       | 1      | -1  | +1  | +1  | -1  | +1  |
| 9         | 1       | 1      | +1  | -1  | -1  | -1  | +1  |
| 10        | 0       | 1      | 0   | 0   | 0   | 0   | 0   |
| 11        | 1       | 1      | -1  | +1  | +1  | +1  | -1  |
| 12        | 1       | 1      | +1  | +1  | +1  | -1  | +1  |
| 13        | 1       | 1      | -1  | +1  | -1  | -1  | -1  |
| 14        | 1       | 1      | +1  | -1  | +1  | -1  | -1  |
| 15        | 1       | 1      | +1  | +1  | -1  | +1  | +1  |

**Table S2:** Experimental factors and level of Plackett-Burman (P-B) design

| FACTORS               | UNIT | LEVELS |     |    |
|-----------------------|------|--------|-----|----|
|                       |      | -1     | 0   | +1 |
| 1. Sample Weight      | g    | 5      | 10  | 15 |
| 2. MWCNT              | mg   | 5      | 10  | 15 |
| 3. MgSO <sub>4</sub>  | mg   | 30     | 45  | 60 |
| 4. PSA                | mg   | 20     | 30  | 40 |
| 5. Activated Charcoal | mg   | 0      | 2.5 | 5  |

**Table S3:** Central composite design matrix with factors and levels

| Factor            | Levels   |             |           | Star point $\alpha$ - 1.41421 |            |
|-------------------|----------|-------------|-----------|-------------------------------|------------|
|                   | Low (-1) | Central (0) | High (+1) | - $\alpha$                    | + $\alpha$ |
| Sample weight (g) | 5        | 10          | 15        | -1.41421                      | +1.41421   |
| MWCNT weight (mg) | 5        | 10          | 15        | -1.41421                      | +1.41421   |

  

| Run order | Pt Type | Blocks | (A) Sample weight | (B) MWCNT weight | Average Recovery |
|-----------|---------|--------|-------------------|------------------|------------------|
| 1         | 0       | 1      | 0                 | 0                | 100.7            |
| 2         | 0       | 1      | 0                 | 0                | 96.2             |
| 3         | -1      | 1      | -1.41421          | 0                | 99.8             |
| 4         | 0       | 1      | 0                 | 0                | 101.1            |
| 5         | -1      | 1      | 0                 | +1.41421         | 87.3             |
| 6         | 1       | 1      | +1                | -1               | 97.4             |
| 7         | 1       | 1      | -1                | +1               | 94.3             |
| 8         | -1      | 1      | +1.41421          | 0                | 107.2            |
| 9         | 0       | 1      | 0                 | 0                | 119.5            |
| 10        | 1       | 1      | +1                | +1               | 99.6             |
| 11        | -1      | 1      | 0                 | -1.41421         | 116.3            |
| 12        | 0       | 1      | 0                 | 0                | 108.9            |
| 13        | 1       | 1      | -1                | -1               | 80.0             |

Table S4: Comparative study for the proposed method.

| Matrix                                                                                                                                               | Analytes                                        | Extraction Techniques/ Method | Clean-up Technique      | Analytical Separation Technique                                                                          |                                                                                                                                                                           |                       | Analytical Method Performance |                               |                   |                |                |                  |
|------------------------------------------------------------------------------------------------------------------------------------------------------|-------------------------------------------------|-------------------------------|-------------------------|----------------------------------------------------------------------------------------------------------|---------------------------------------------------------------------------------------------------------------------------------------------------------------------------|-----------------------|-------------------------------|-------------------------------|-------------------|----------------|----------------|------------------|
|                                                                                                                                                      |                                                 |                               |                         | Stationary Phase                                                                                         | Mobile Phase/ Carrier Gas                                                                                                                                                 | Analytical Instrument | LOD                           | LOQ                           | ER (%) & EF       | (%) RSD        | R <sup>2</sup> | ME %             |
| Banana <sup>24</sup>                                                                                                                                 | 294 Pesticides                                  | QuEChERS                      | dSPE                    | Zorbax XDB C18 column (2.1 × 150 mm, 3.5 μm) (Agilent, USA)                                              | A (5 mM NH <sub>4</sub> HCO <sub>2</sub> in HPLC grade H <sub>2</sub> O with 0.1% HCO <sub>2</sub> H) and B (5 mM NH <sub>4</sub> HCO <sub>2</sub> in CH <sub>3</sub> OH) | LC-MS/MS              |                               | 0.01 mg kg <sup>-1</sup>      | 73-93%            |                |                |                  |
|                                                                                                                                                      |                                                 |                               |                         | DB-5 MS column (5% phenyl 95% dimethylarylene siloxane, Agilent, USA)                                    | Helium (99.999% purity)                                                                                                                                                   | GC-MS/MS              |                               |                               |                   |                |                |                  |
| Banana <sup>25</sup>                                                                                                                                 | azoxystrobin, difenoconazole, and propiconazole | QuEChERS                      | dSPE                    | An RTX-5 MS capillary column (30 m × 0.25 mm; 0.5 μm film thickness)                                     | helium gas (99.999%)                                                                                                                                                      | GC-QMS                | 0.01–0.05 mg kg <sup>-1</sup> | 0.03–0.10 mg kg <sup>-1</sup> | 74.78 and 99.98%  | < 20%          |                |                  |
| tomato, cucumber, cowpea, pepper, eggplant, potato, banana, grape, and citrus) <sup>26</sup>                                                         | fluopyram                                       | QuEChERS                      | PSA, C18 and MWCNTs-NH2 | TG-5SiIMS weakly polarised capillary column (30 m × .25 mm × .25 μm)                                     | Not mentioned                                                                                                                                                             | GC-MS/MS              |                               |                               | 87.02% to 101.42% | 9.25%          |                | -1.41% to 17.67% |
| tomato, cucumber, zucchini, eggplant, okra, green pepper, grape, coriander, parsley, bean, rocca, leek, peppermint, dates, and lettuce <sup>27</sup> | 49 pesticide                                    | QuEChERS                      | dSPE+GCB                | (TG-5MS; Thermo Scientific), 30 m long, internal diameter of 0.25 mm, and the film thickness was 0.25 μm | helium (99.999)                                                                                                                                                           | GC-MS/MS              | 0.0005 to 0.0024 mg/kg,       | 0.0011 to 0.0047 mg/kg        | 78 % to 107 %,    | less than 20 % | 0.99           |                  |

|                                        |                                                 |                                                                                                                                                                                                                                                                                                                                                                                                                                                                                                                                     |                                                                                                         |                                                   |                                                                        |                                                                            |                                                        |                               |                               |                                                                           |           |                                    |                              |
|----------------------------------------|-------------------------------------------------|-------------------------------------------------------------------------------------------------------------------------------------------------------------------------------------------------------------------------------------------------------------------------------------------------------------------------------------------------------------------------------------------------------------------------------------------------------------------------------------------------------------------------------------|---------------------------------------------------------------------------------------------------------|---------------------------------------------------|------------------------------------------------------------------------|----------------------------------------------------------------------------|--------------------------------------------------------|-------------------------------|-------------------------------|---------------------------------------------------------------------------|-----------|------------------------------------|------------------------------|
| Hawk Tea <sup>28</sup>                 | 186 Pesticides                                  | EMR-Lipid materials. Then, 10 mL distilled H <sub>2</sub> O, shaken for 30 s, stand for 30 min, the extraction done with 10 mL C <sub>2</sub> H <sub>3</sub> N, shaken 30 s, put in 4 g NaCl and shaken. centrifuged at 5000 rpm for 10 min                                                                                                                                                                                                                                                                                         | QuEChERS purification falcon tube (contained with 1200 mgMgSO <sub>4</sub> , 400 mgPSA, 200 mg MWCNTs). | MgSO <sub>4</sub> PSA MWCNT                       | SH-Rxi-5SiI MS column (30 m 0.25 mm i.d., 0.25 μm)                     | He                                                                         | GCMS-TQ8050 triple-quadrupole (QqQ) MRM                | 0.001–0.02 mg/kg              | 0.005 mg/kg~0.05 mg/kg        | 70–120%                                                                   | 0.3–14.4% | 0.99                               |                              |
| Banana <sup>29</sup>                   | azoxystrobin, difenoconazole, and propiconazole | Modified QuEChERS                                                                                                                                                                                                                                                                                                                                                                                                                                                                                                                   |                                                                                                         | dSPE                                              | RTX-5 ms capillary column (30 m × 0.25 mm DI × 0.50 μm film thickness) | helium gas (99.999%)                                                       | (GC-MS), model DSQII, Thermo (USA)                     | 0.018<br>0.066<br>0.007       | 0.054<br>0.199<br>0.022       |                                                                           |           | 0.9985,<br>0.9966<br>and<br>0.9997 | difenoc<br>onazole<br>- 6.8% |
| banana- and citrus fruit <sup>30</sup> | Thiabendazole                                   | 5 gm sample + 20 g Na <sub>2</sub> SO <sub>4</sub> + Na <sub>2</sub> HPO <sub>4</sub> + 30 mL C <sub>4</sub> H <sub>8</sub> O <sub>2</sub> , Centrifugation at 3100 rpm for 8 min- supernatant to 100-ml Erlenmeyer flask, residual plug was reextracted with another 20 ml of C <sub>4</sub> H <sub>8</sub> O <sub>2</sub> . For banana 10-g sample + 40 g Na <sub>2</sub> SO <sub>4</sub> + 50 ml C <sub>4</sub> H <sub>8</sub> O <sub>2</sub> , reextracted with another 30 ml of C <sub>4</sub> H <sub>8</sub> O <sub>2</sub> . | Sep-Pak Vac Silica /Bond Elut PRS                                                                       |                                                   | C18 columns, (4.6 mm 250 mm, 5.0 m, Shiseido, Tokyo, Japan)            | phosphoric acid buffer (pH = 7), acetonitrile, and methanol (7:2:1, v/v/v) | HPLC PDA system (Waters Co., Milford, MA, USA)         | 0.009 and 0.017 μg/mL         | 0.028 and 0.052 μg/mL         | 93.61 to 98.08%                                                           | 1.33%     | 0.999                              |                              |
|                                        |                                                 |                                                                                                                                                                                                                                                                                                                                                                                                                                                                                                                                     |                                                                                                         |                                                   | C18 columns, (4.6 mm 250 mm, 5.0 m, Shiseido, Tokyo, Japan)            | phosphoric acid buffer (pH = 7), acetonitrile, and methanol (7:2:1, v/v/v) | 4500 QTRAP LC-MS/MS system (AB Sciex, Framingham, USA) |                               |                               |                                                                           |           |                                    |                              |
| Banana (Proposed Method)               | 200 Pesticide                                   | Modified QuEChERS                                                                                                                                                                                                                                                                                                                                                                                                                                                                                                                   |                                                                                                         | 60 mg MgSO <sub>4</sub> , 20 mg PSA & 15 mg MWCNT | SH-I-5SiI MS, L 30 m X ID 0.25 μm X dF 0.25 μm                         | Helium (99.9999%)                                                          | Nexis, GC 2030 and GC-MS-TQ8050NX, Shimadzu            | 0.45-6.33 μg kg <sup>-1</sup> | 1.44-9.59 μg kg <sup>-1</sup> | 71%-116% (10 μg kg <sup>-1</sup> ) and 72%-119% (25 μg kg <sup>-1</sup> ) | < 20%     | >0.99                              | -20+20                       |

<sup>30</sup>AS PER, [https://doi.org/10.1016/S0021-9673\(98\)00185-X](https://doi.org/10.1016/S0021-9673(98)00185-X) AND <https://doi.org/10.1016/j.jmicroc.2017.05.017>

Fig S1: Individual Chromatograms of 200 pesticides.

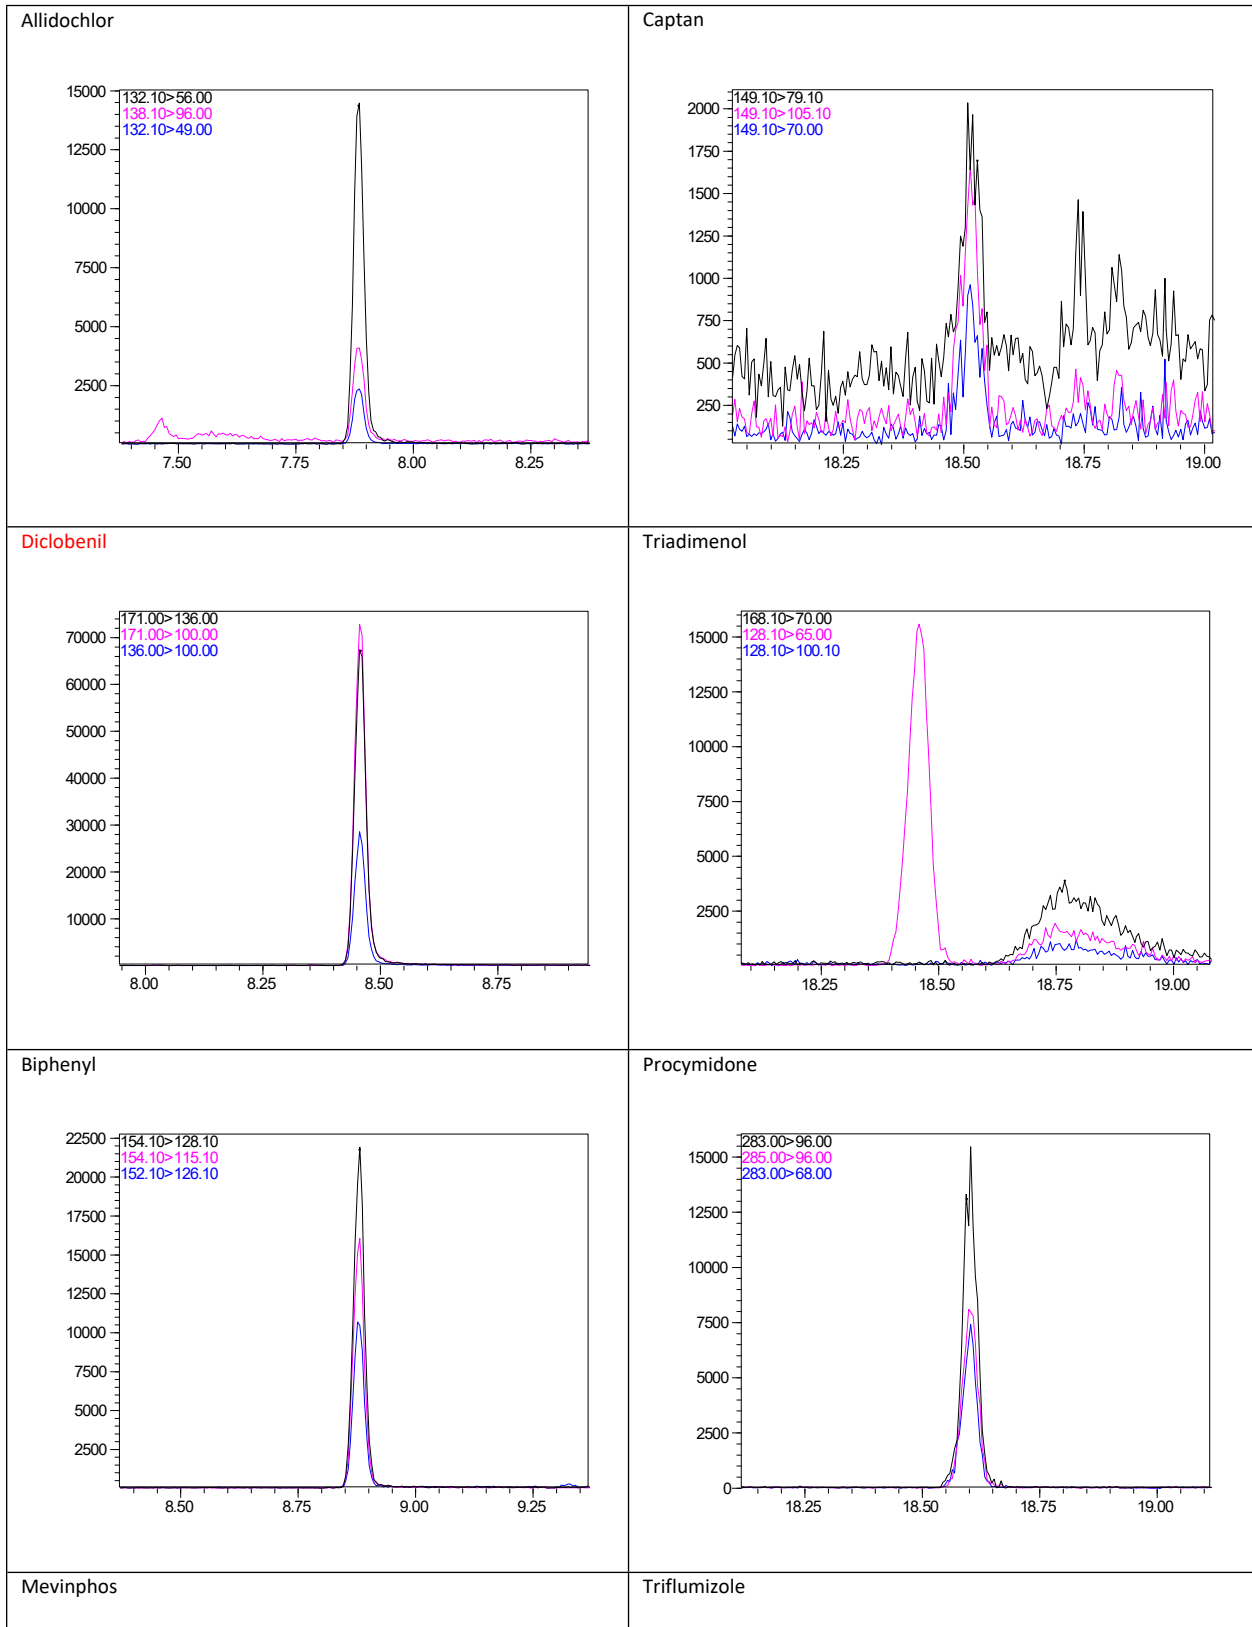

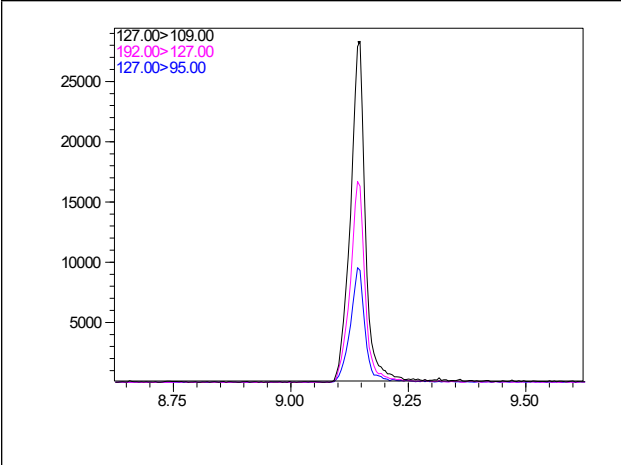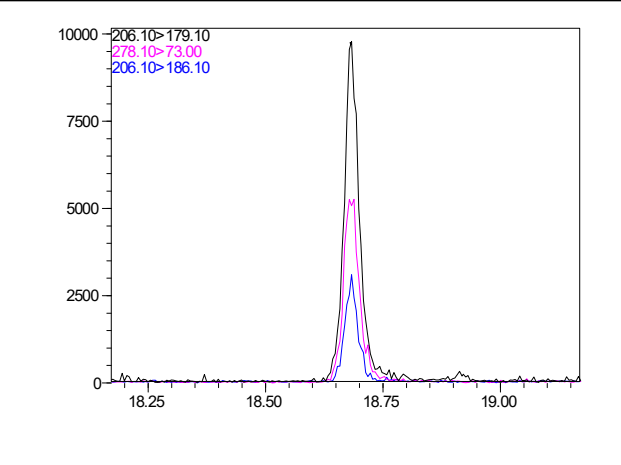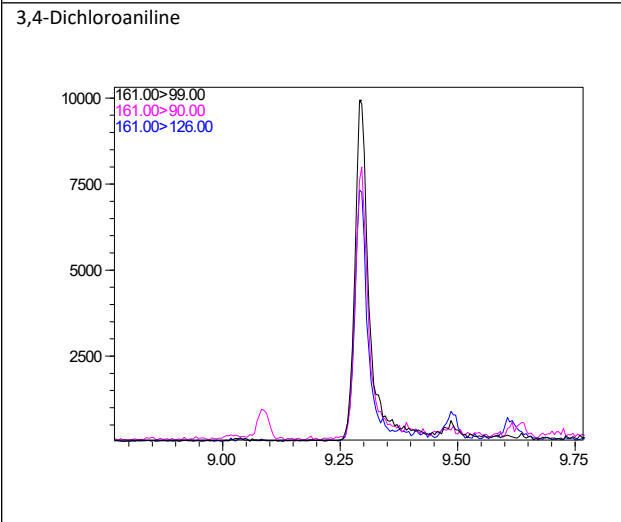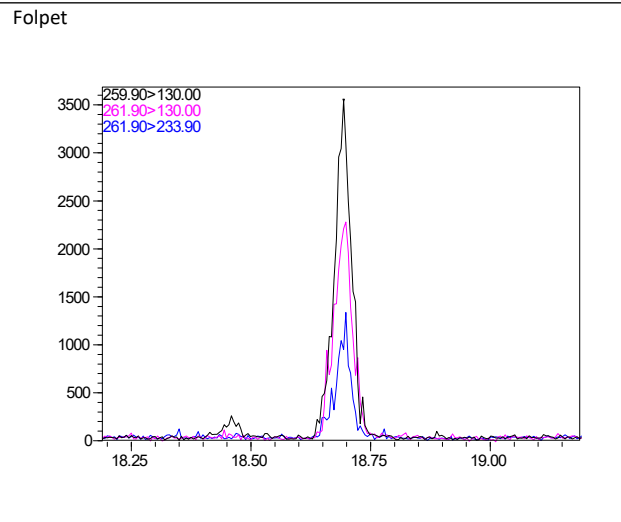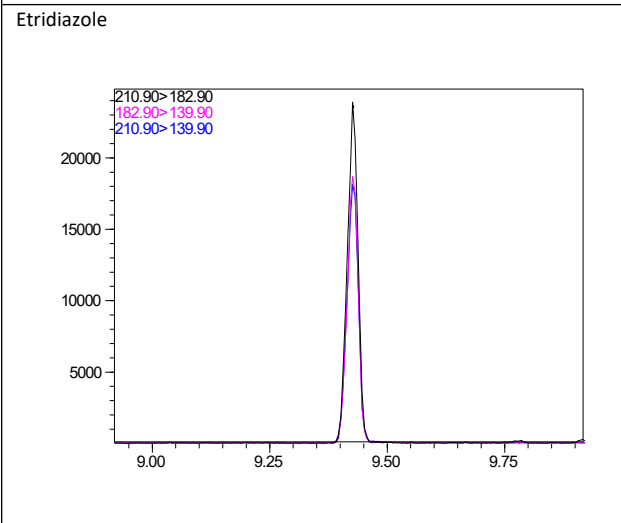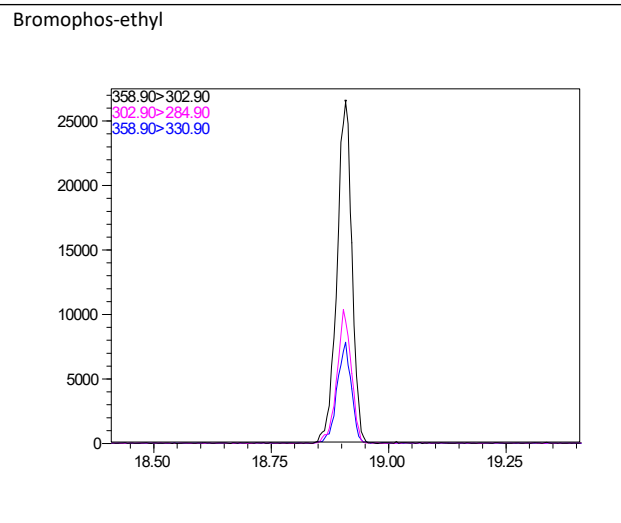

Pebulate

Chlorbenside

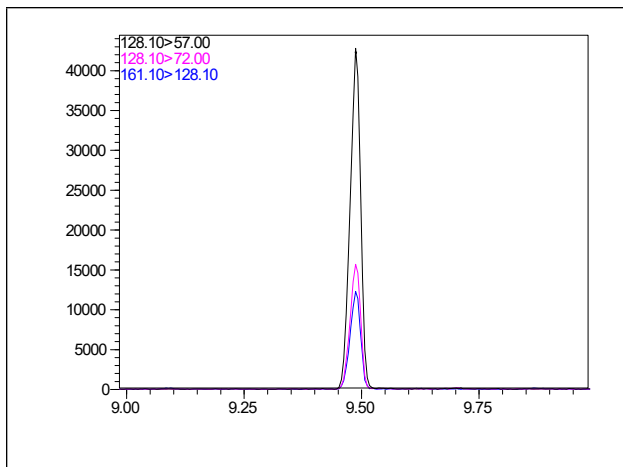

N-(2,4-dimethylphenyl) formamide

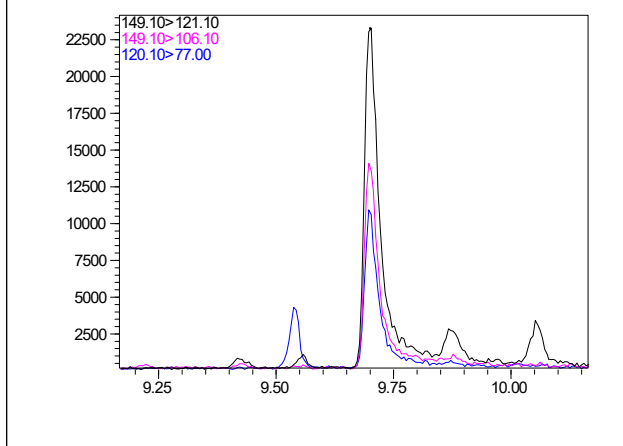

THPI (Tetrahydrophthalimide)

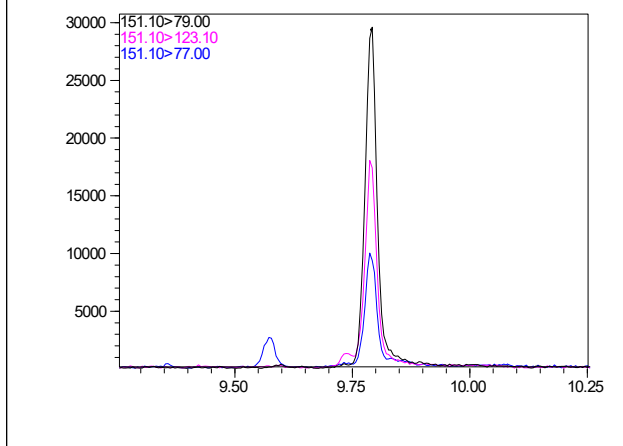

Methacrifos

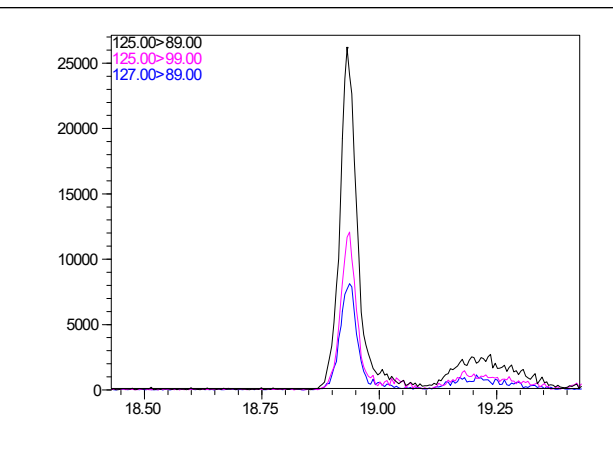

trans-Chlordane

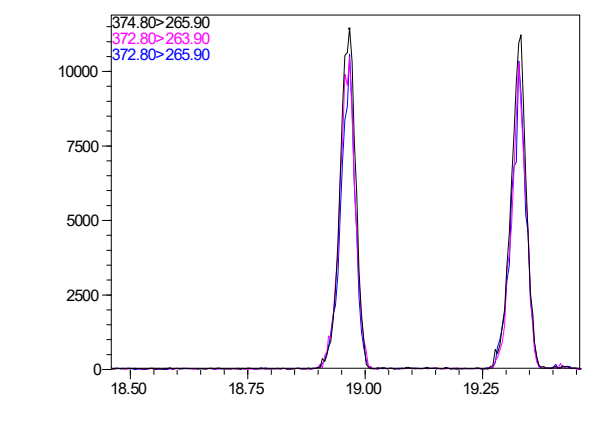

o,p'-DDE

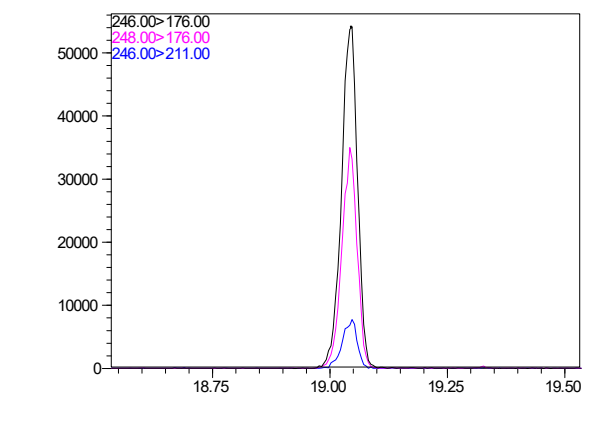

cis-Chlordane

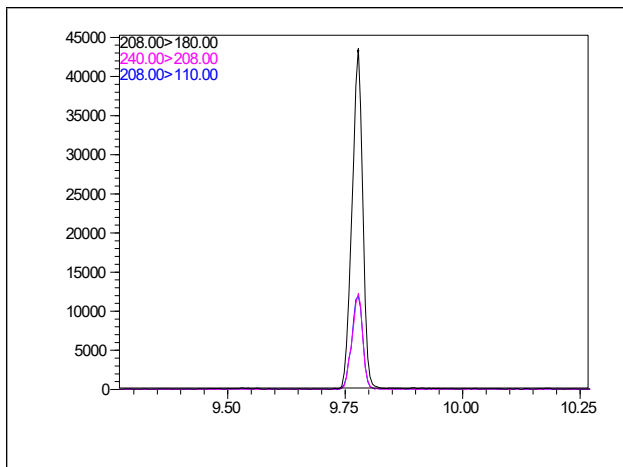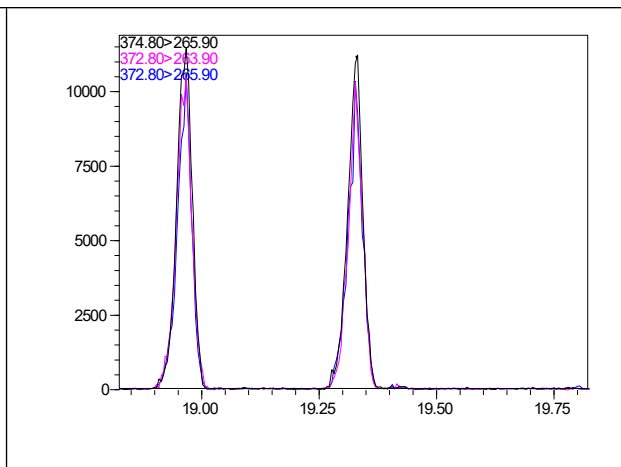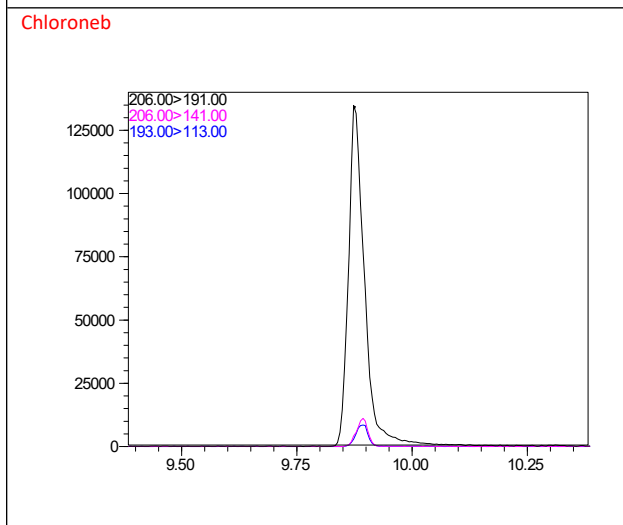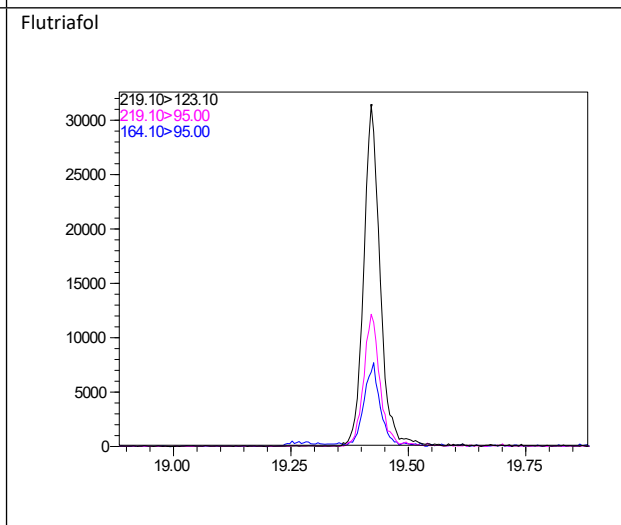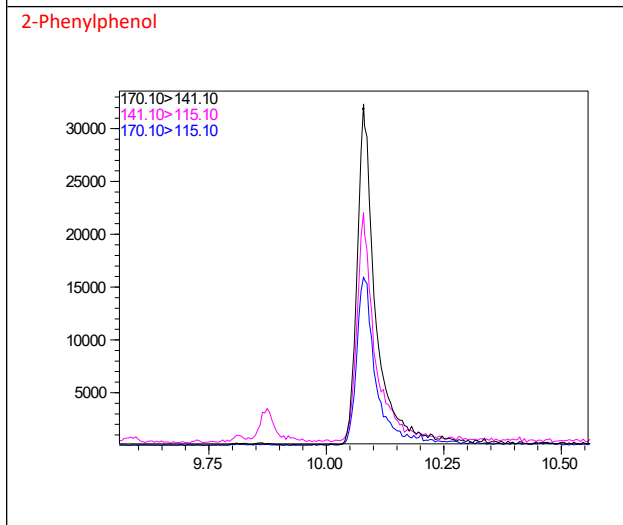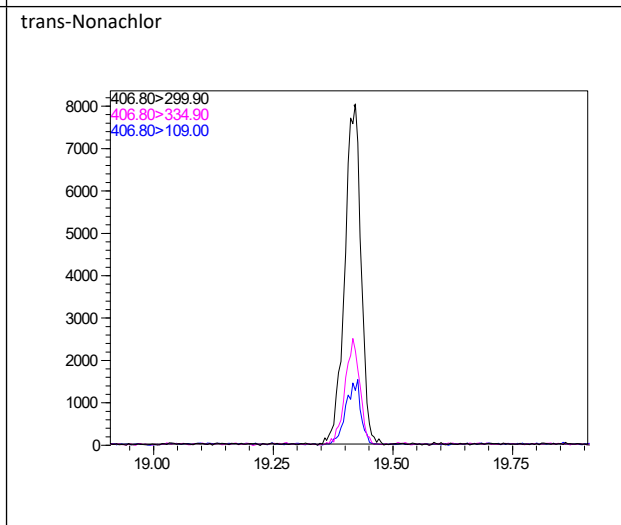

Pentachlorobenzene

(Z)-Chlorfenvinphos



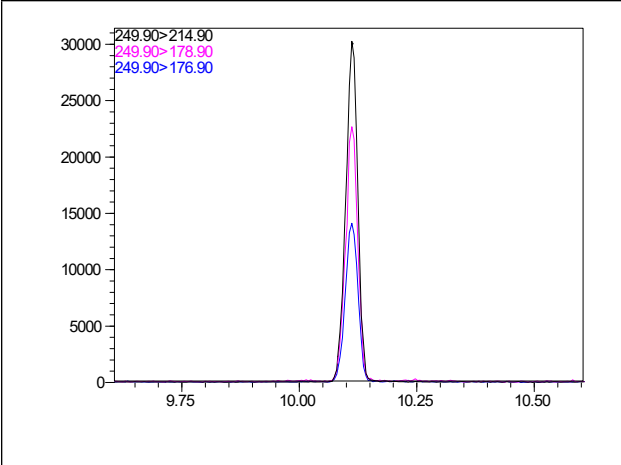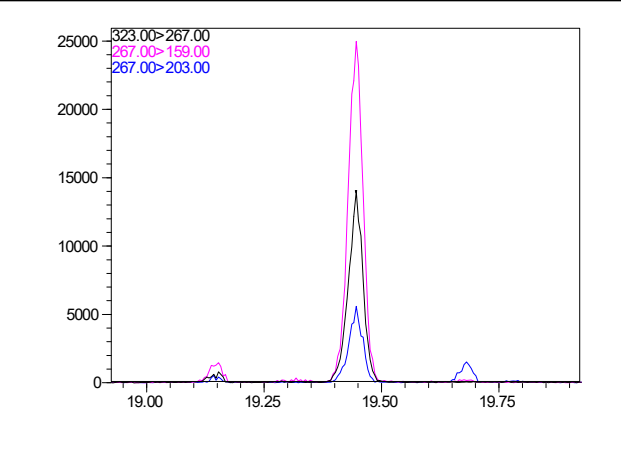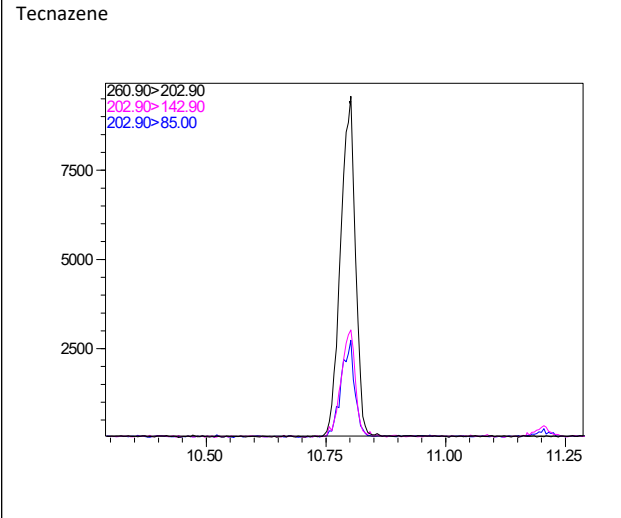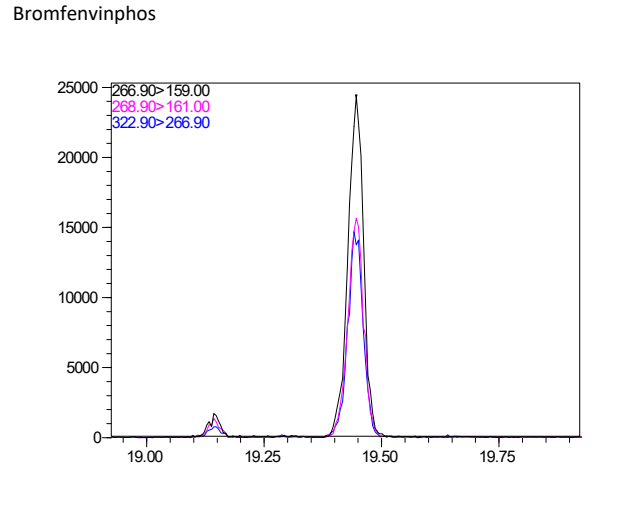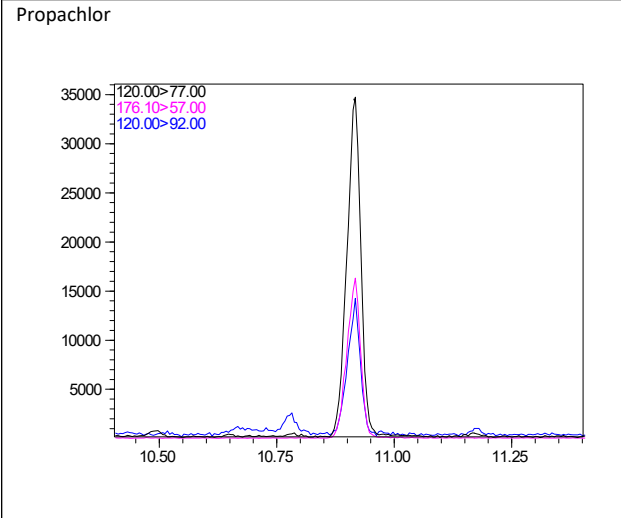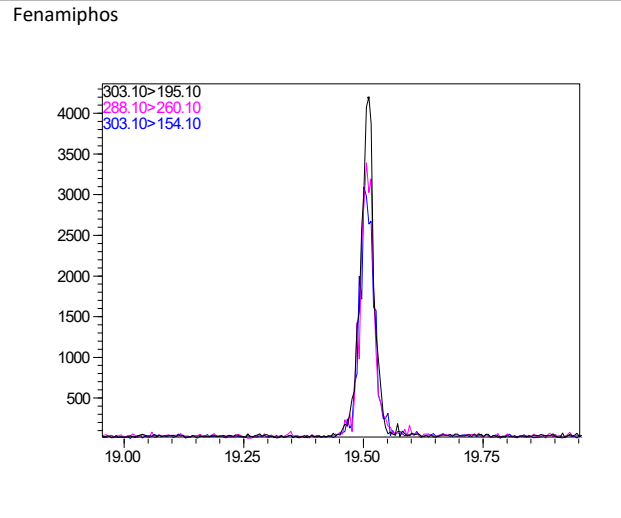

Diphenylamine

Flutolanil

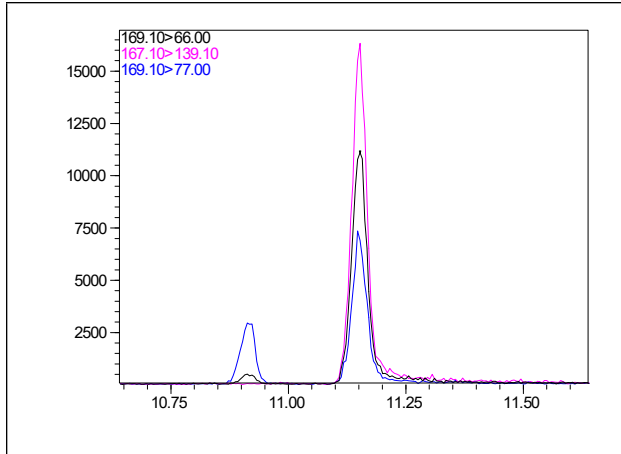

2,3,5,6-Tetrachloroaniline

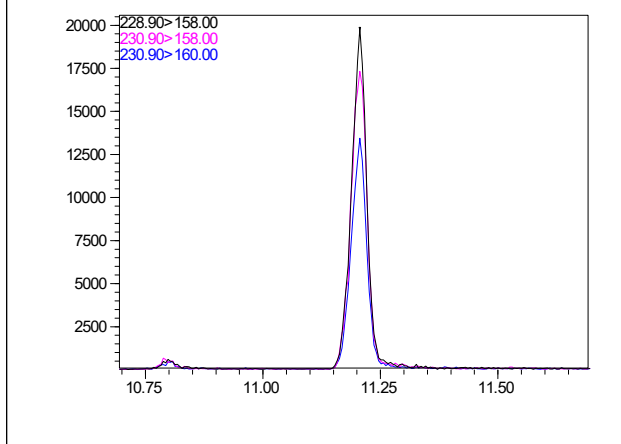

Cycloate

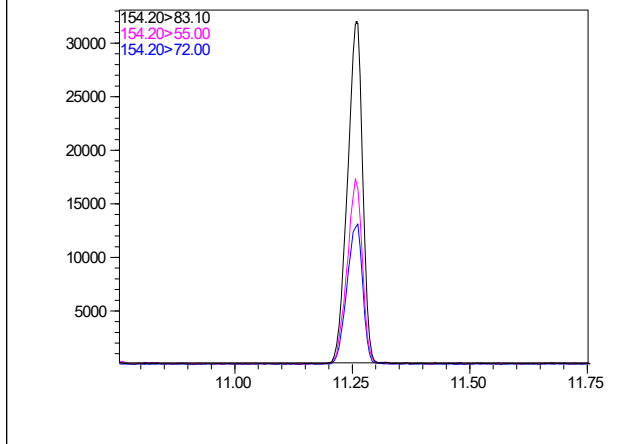

Ethalfuralin

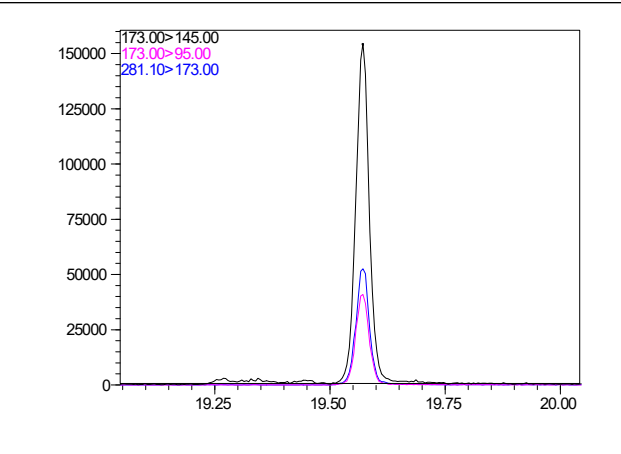

Chlorfenson

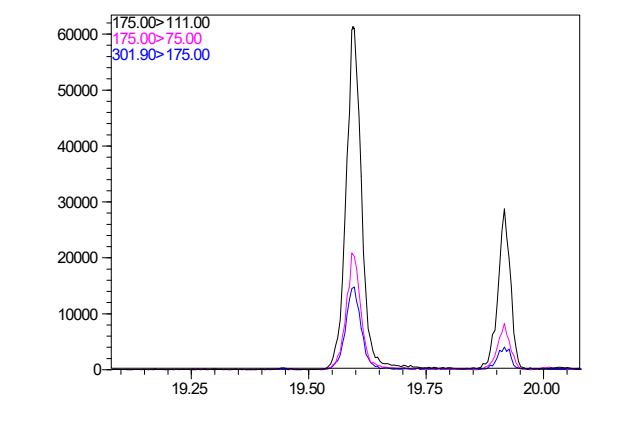

Iodofenphos

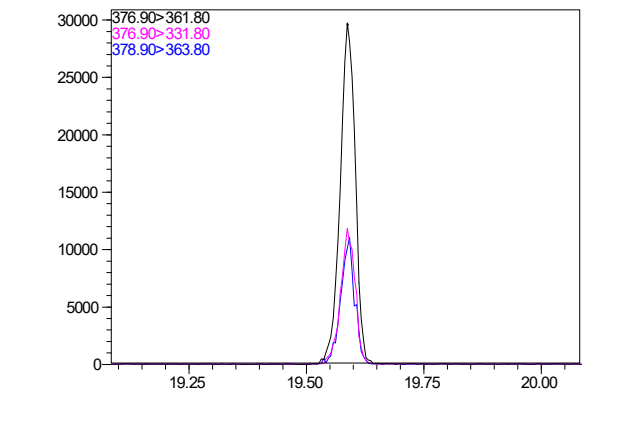

Fludioxonil

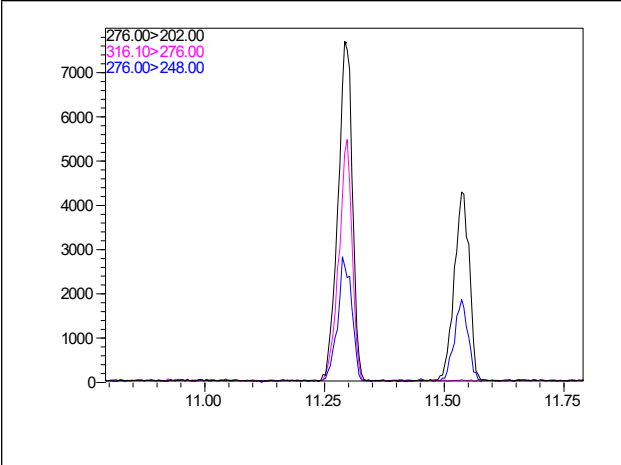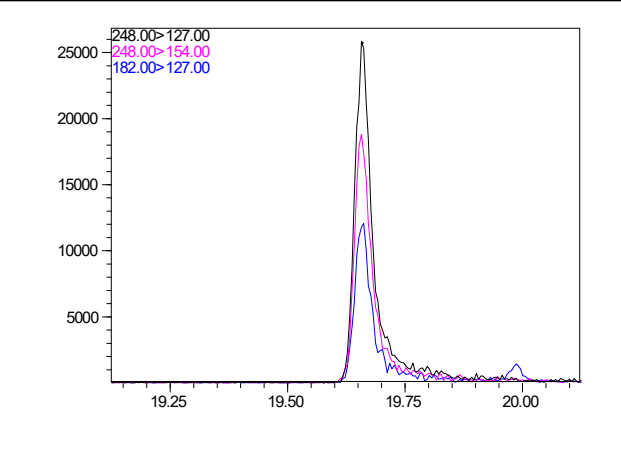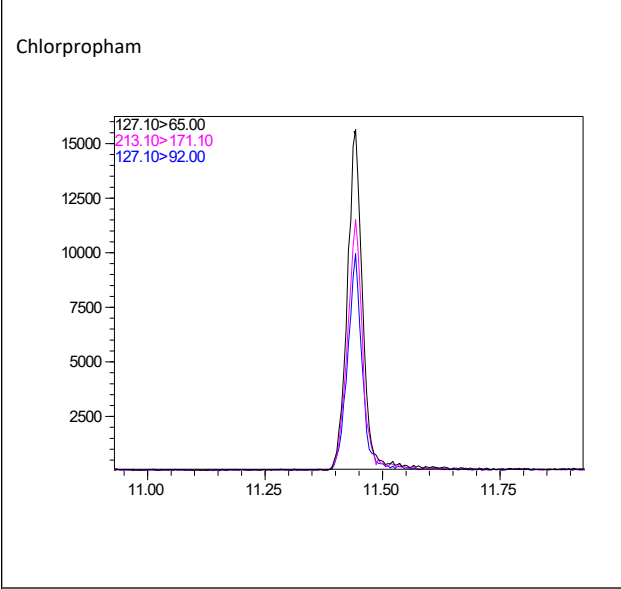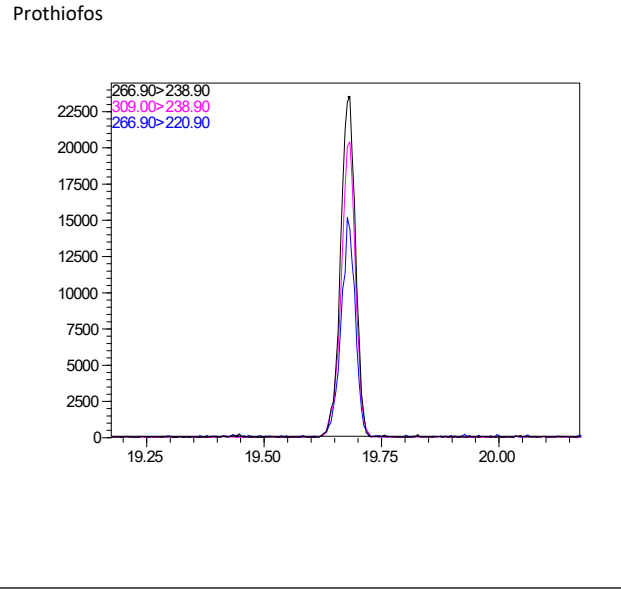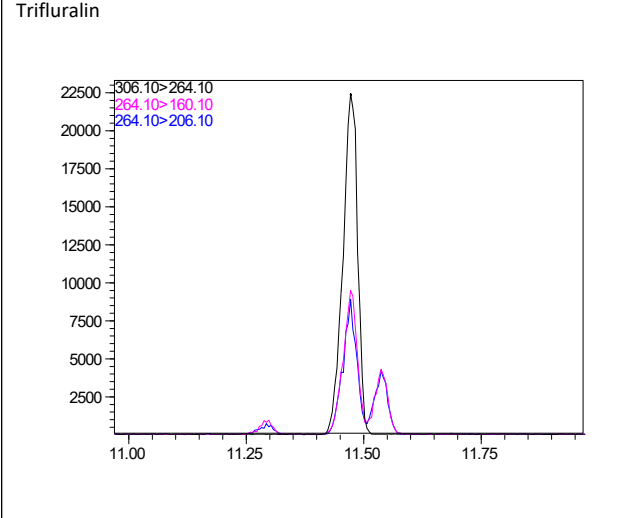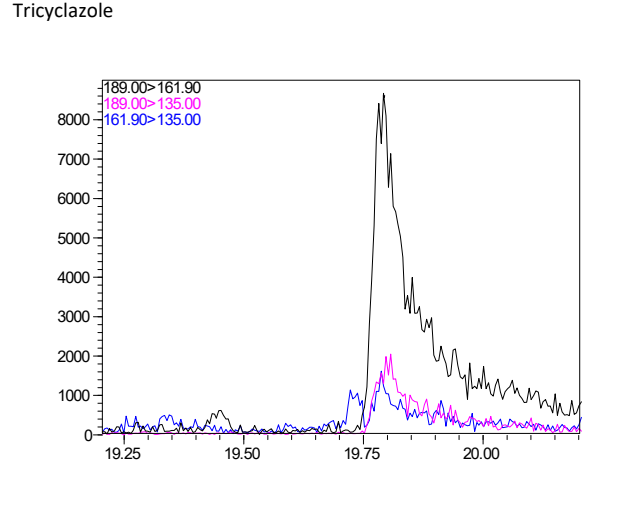

Benfluralin

Pretilachlor

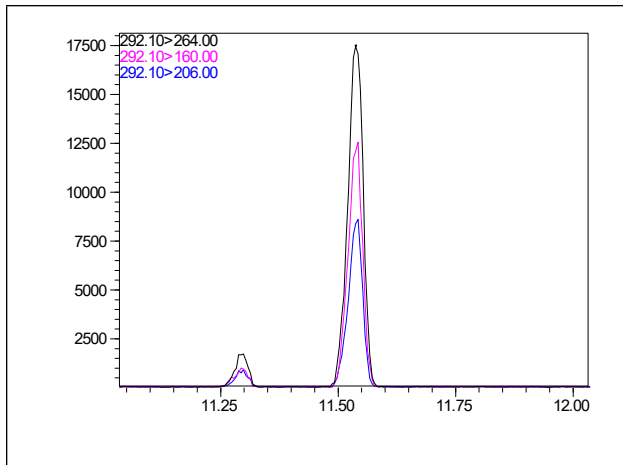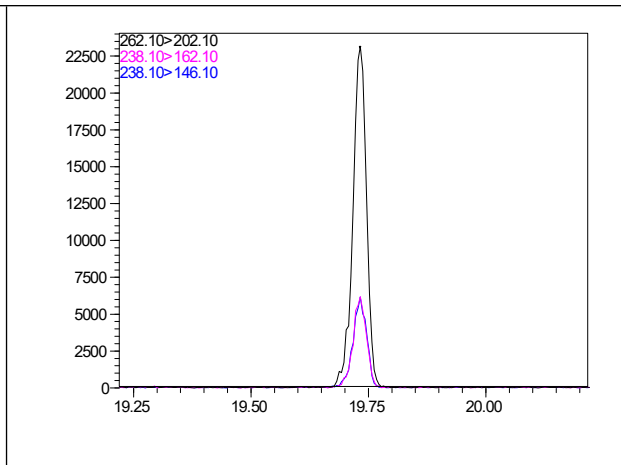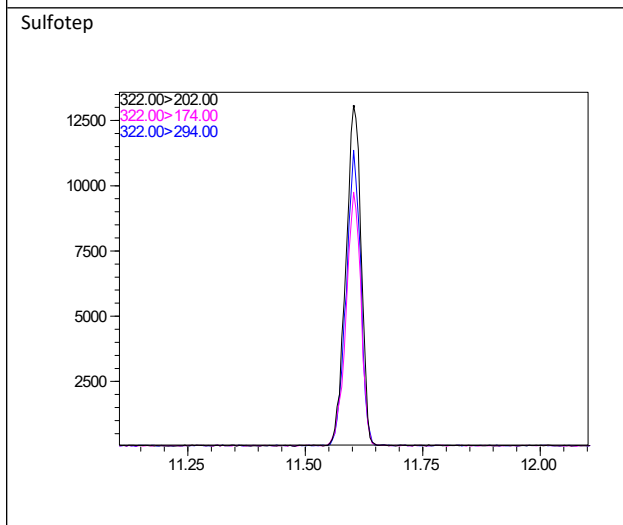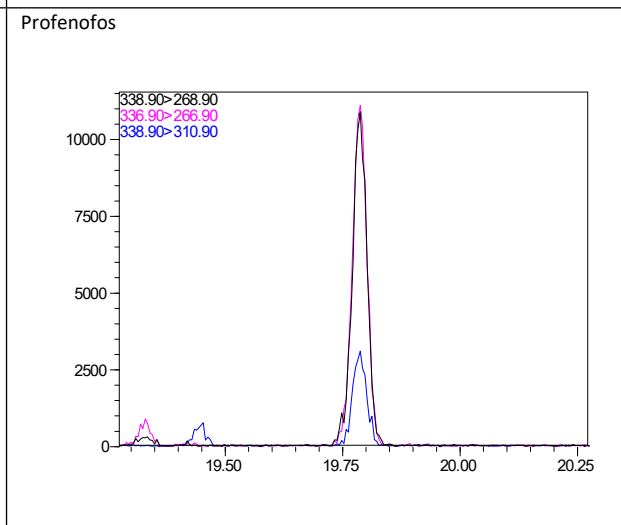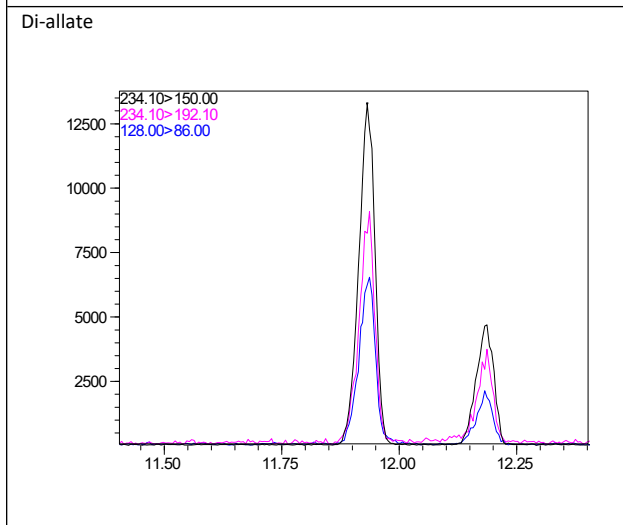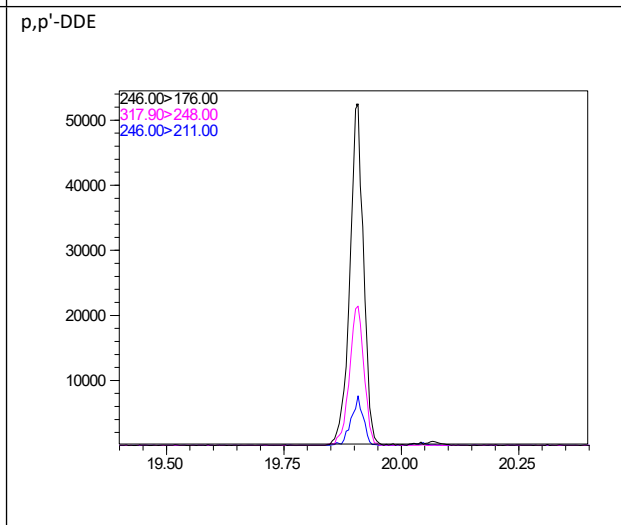

Phorate

Oxadiazon

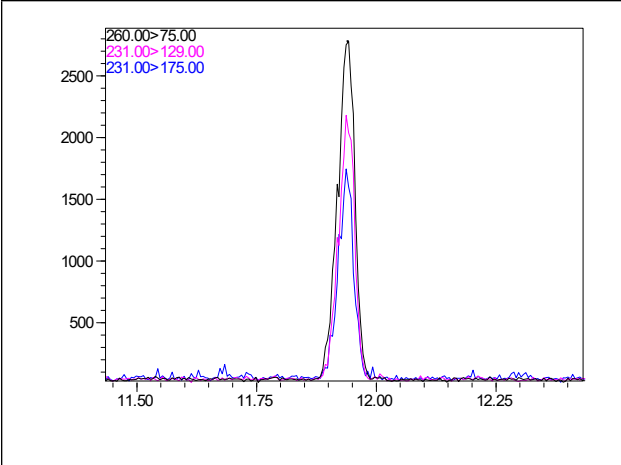

alpha-BHC

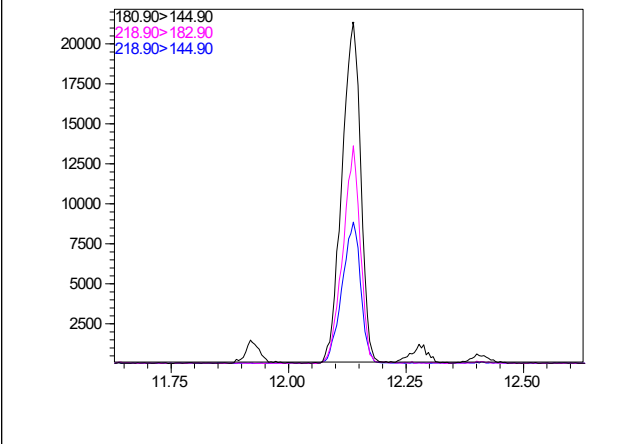

Hexachlorobenzene

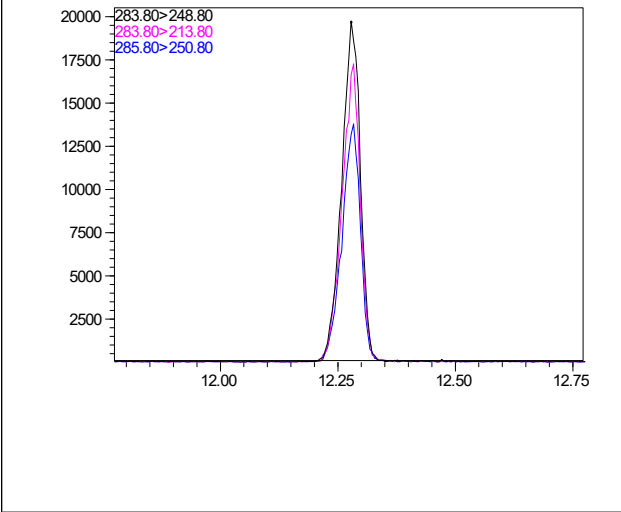

Pentachloroanisole

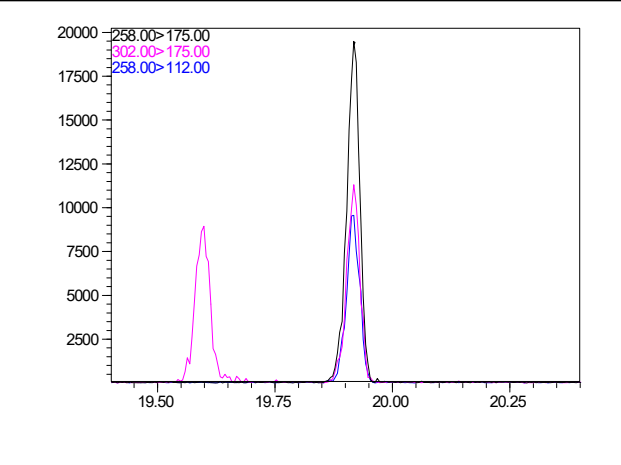

Myclobutanil

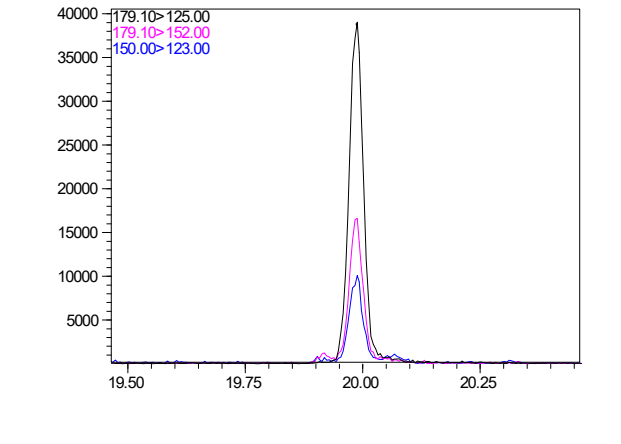

Dieldrin

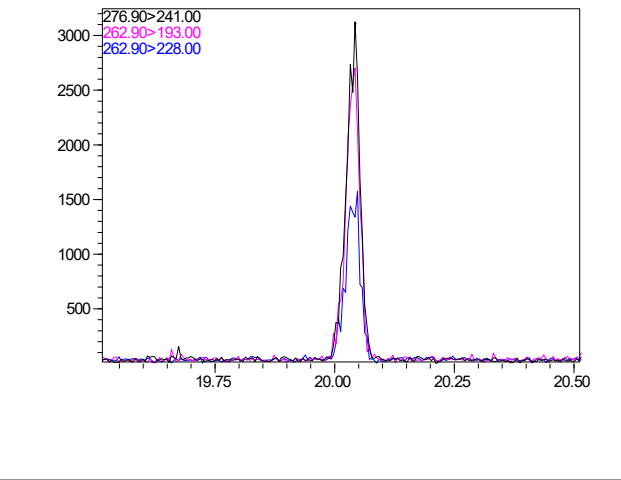

Flusilazole

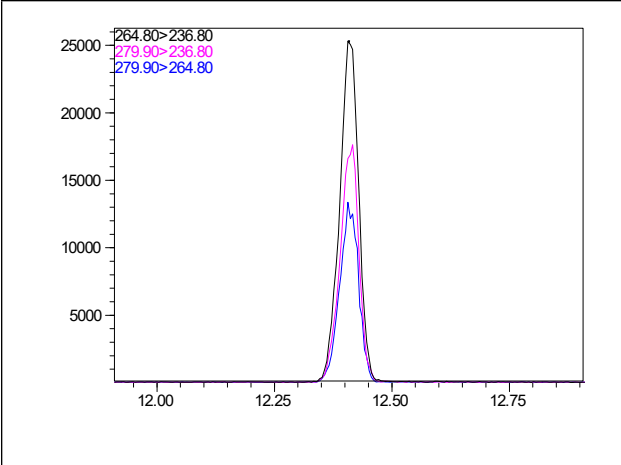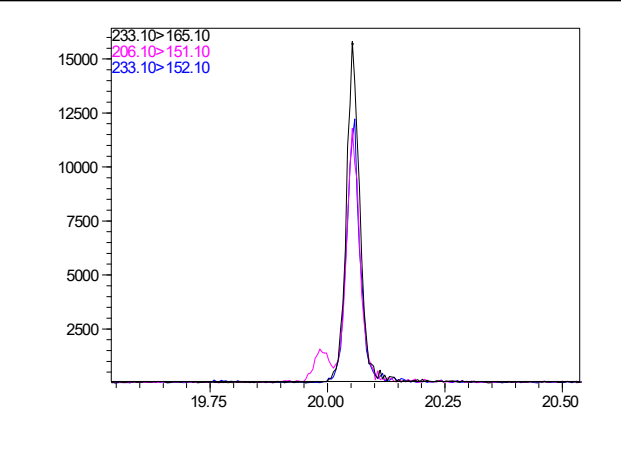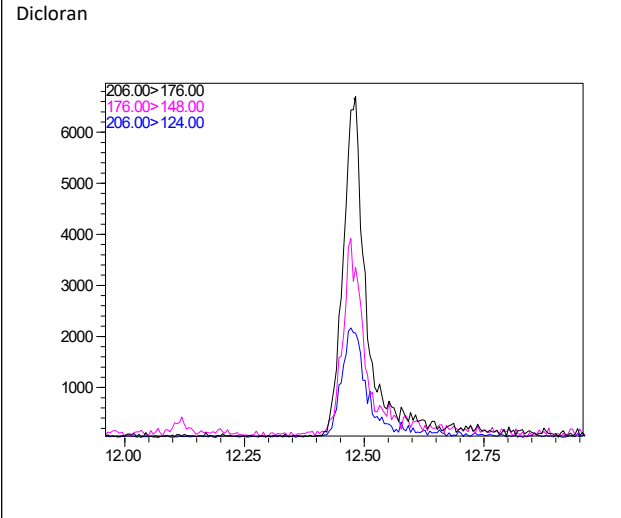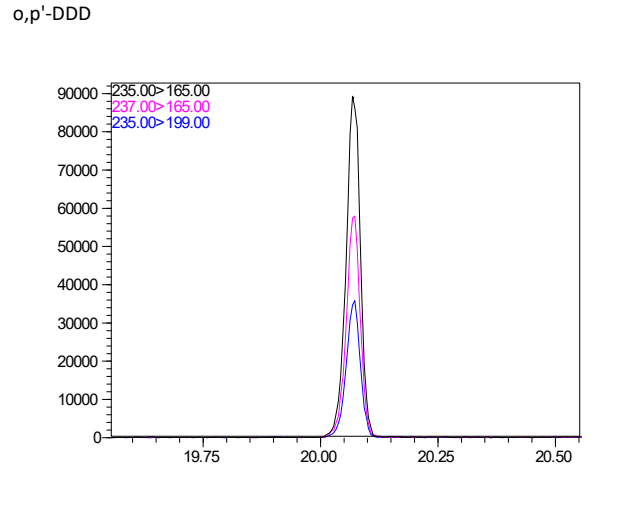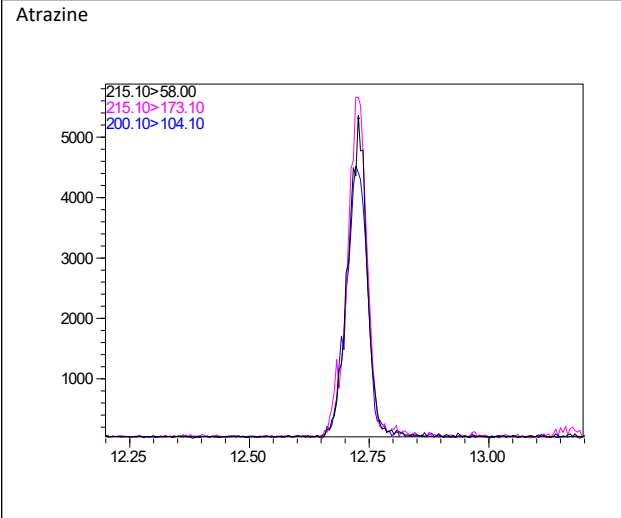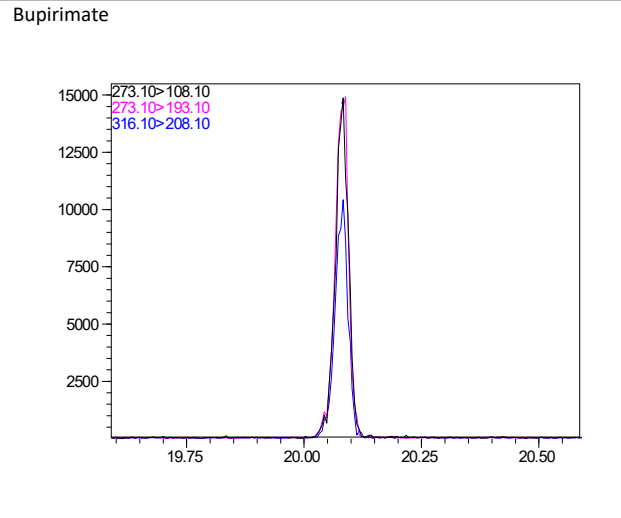

beta-BHC

Oxyfluorfen

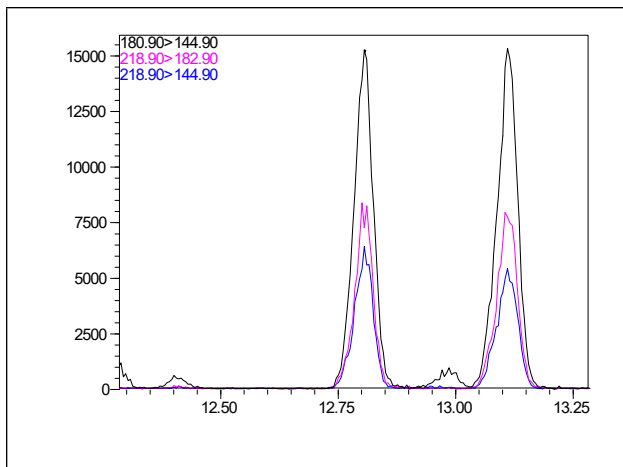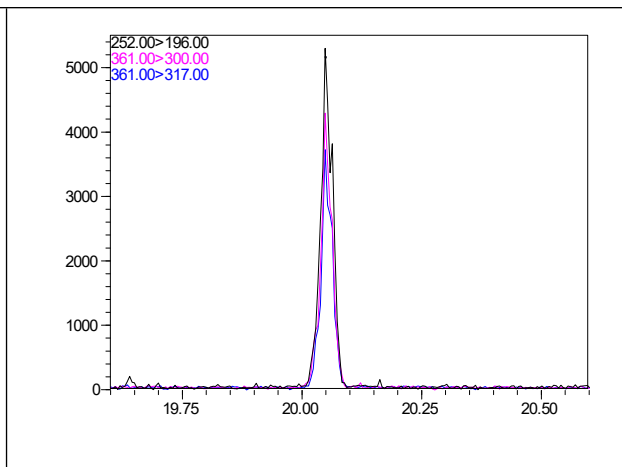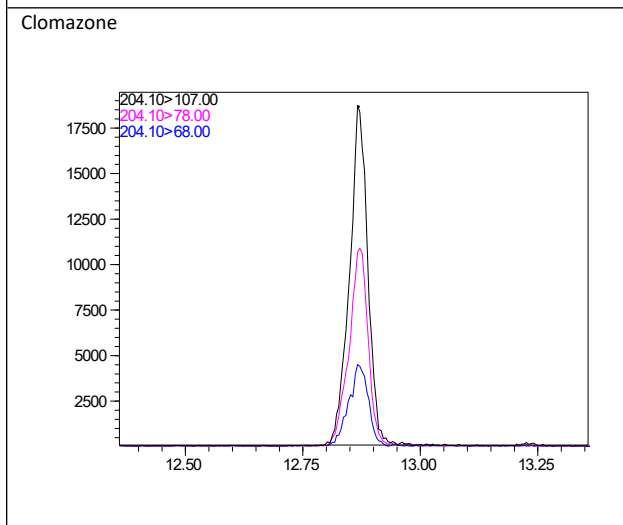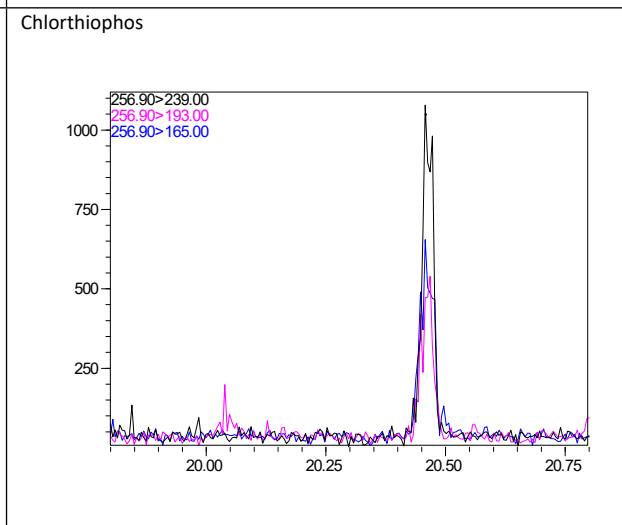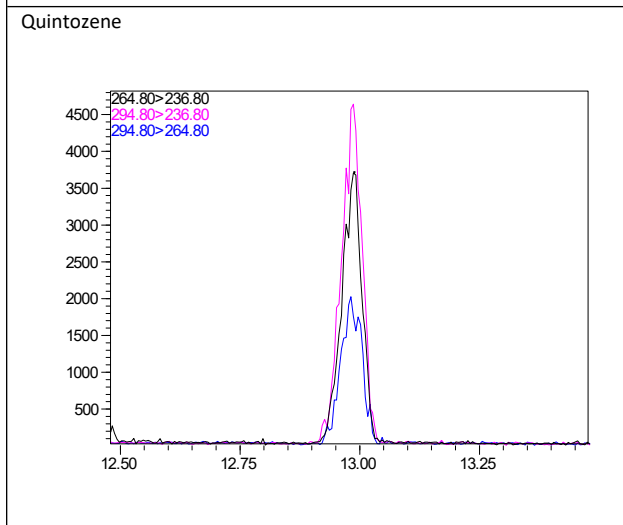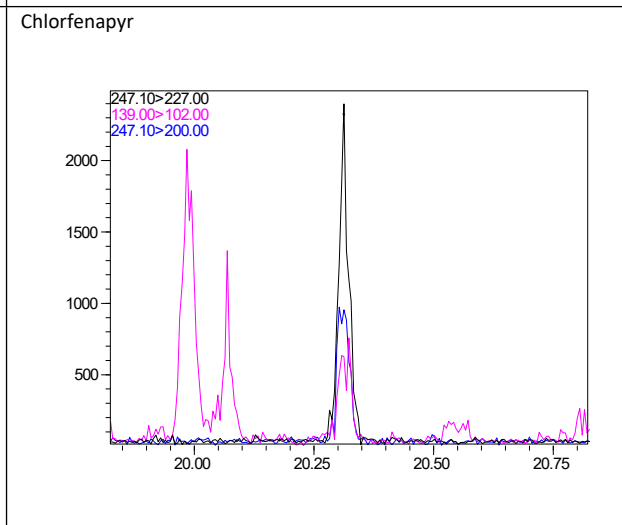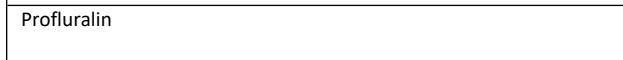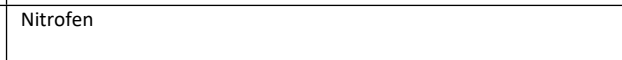

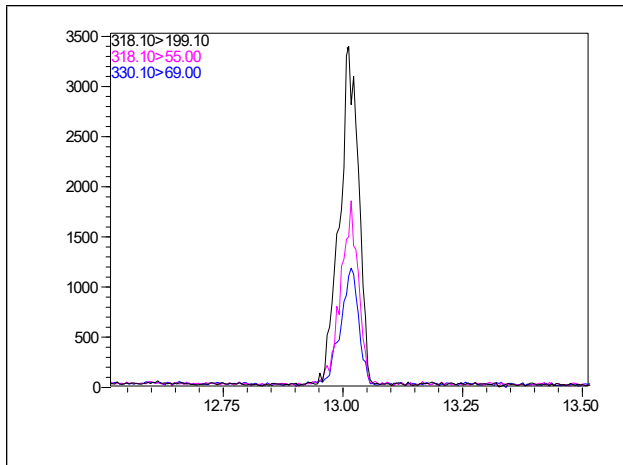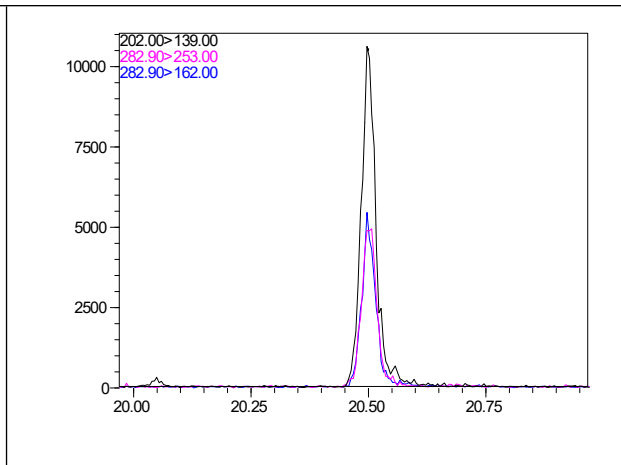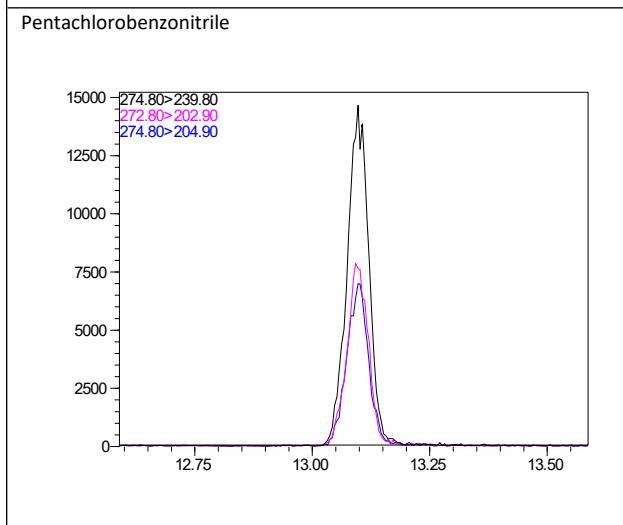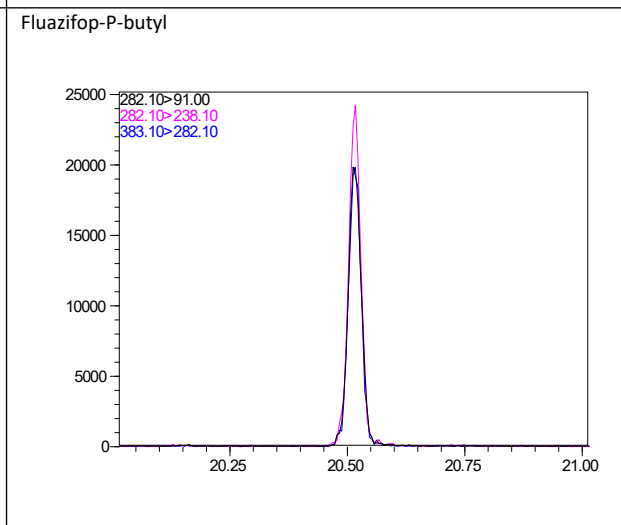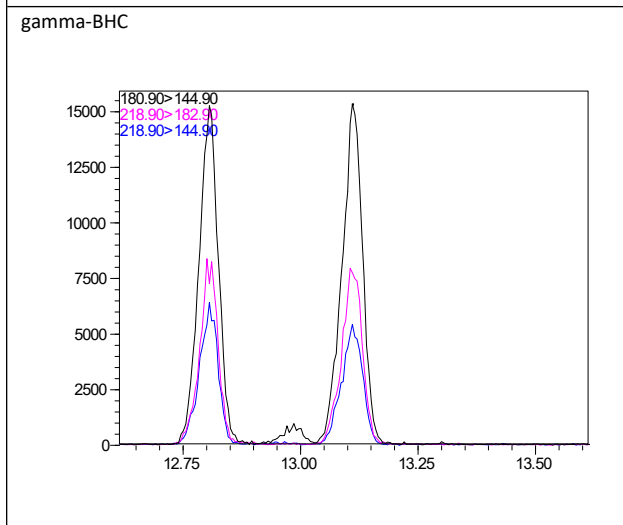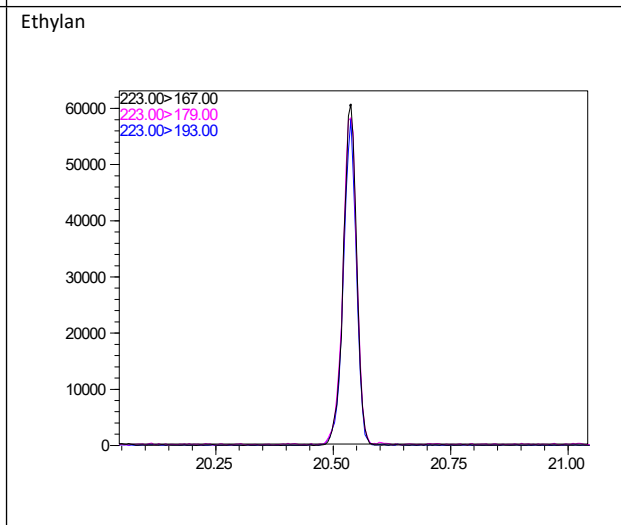

Terbuthylazine

Endrin



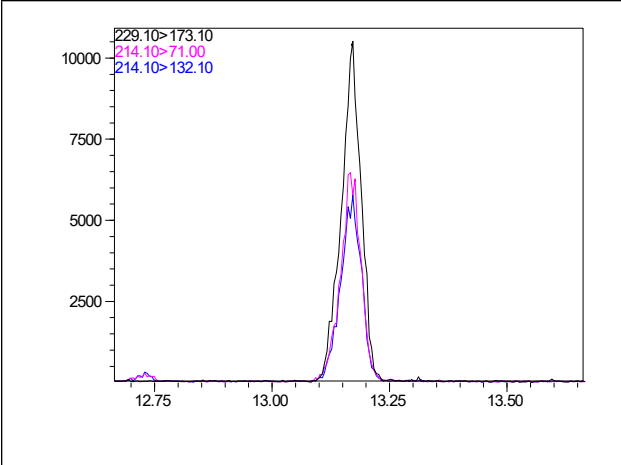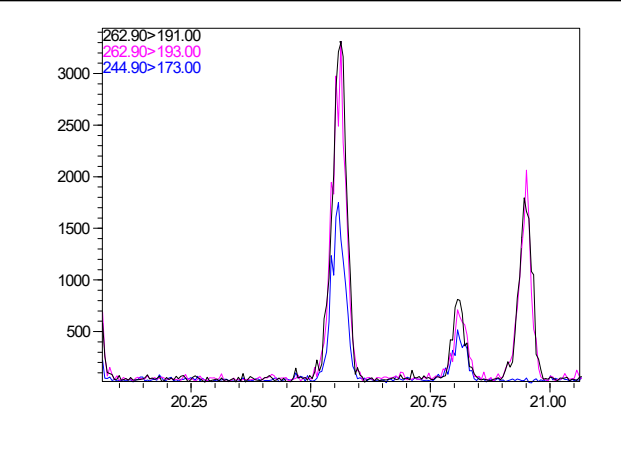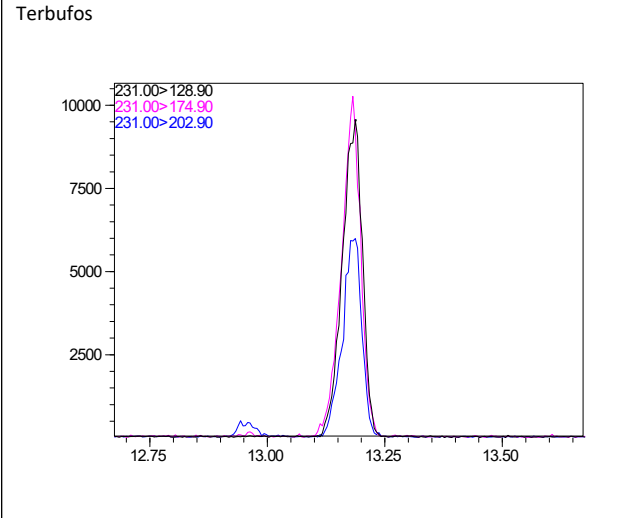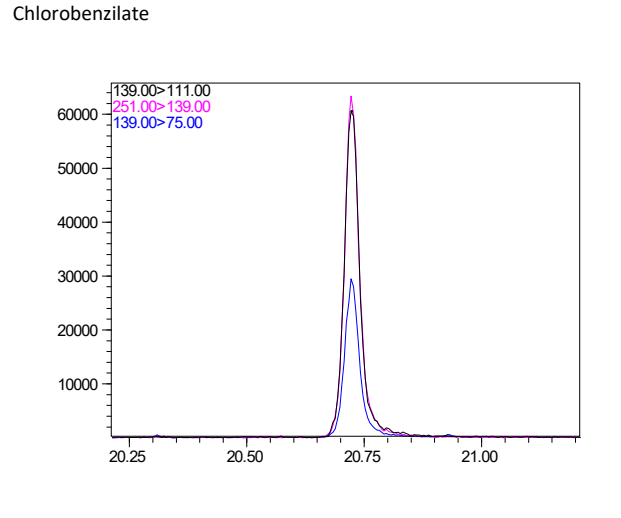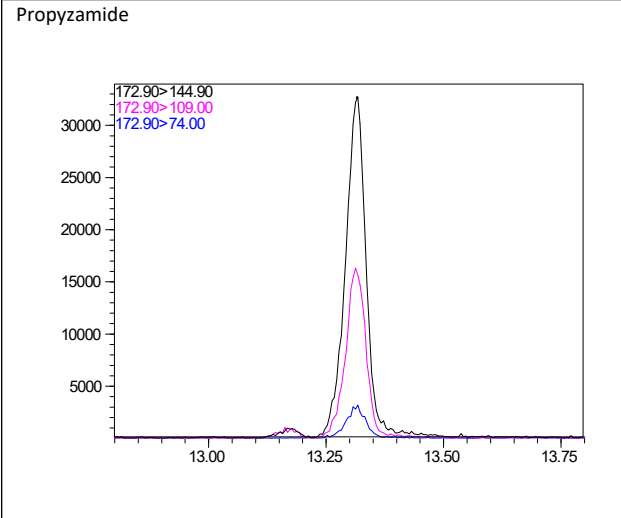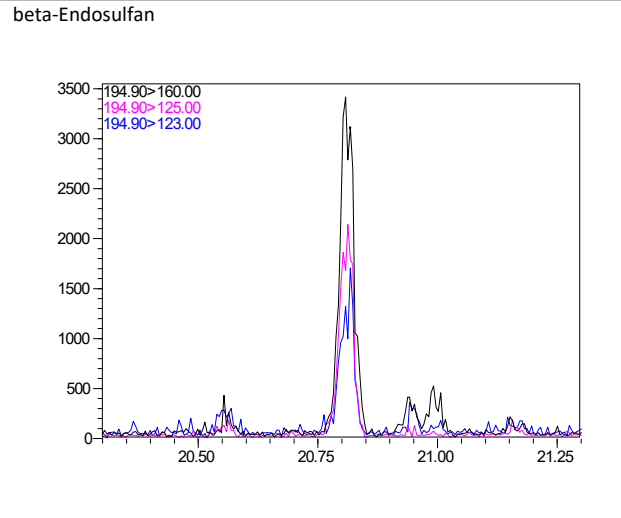

Fonofos

Ethion

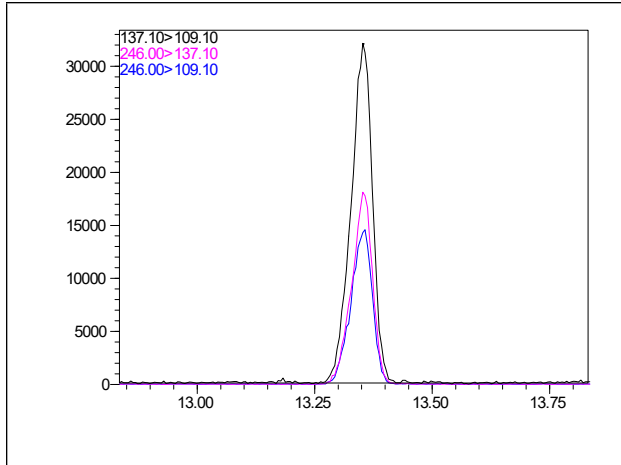

Diazinon

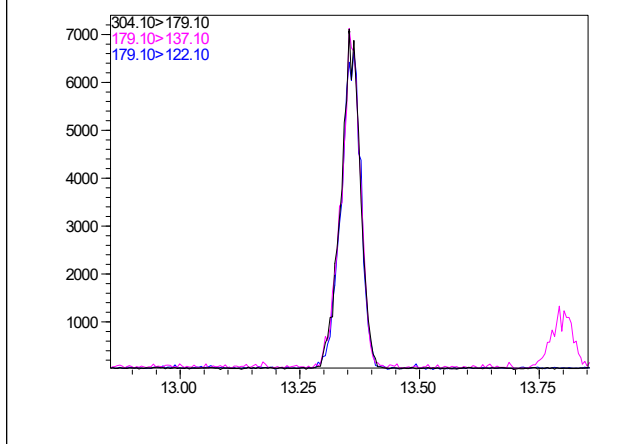

Fluchloralin

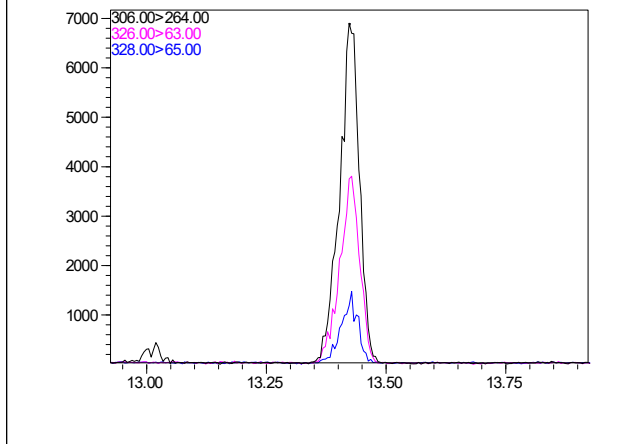

Pyrimethanil

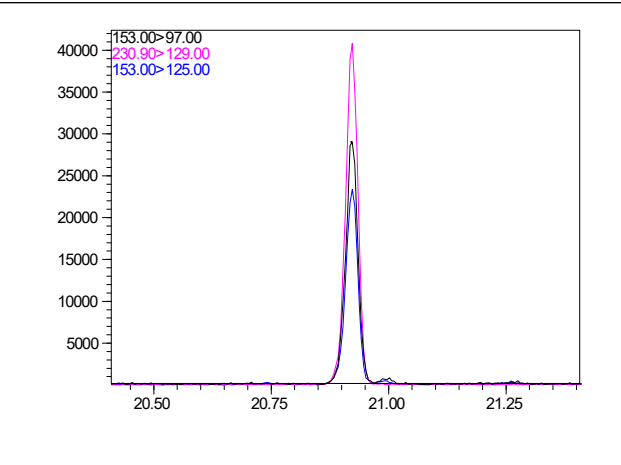

p,p'-DDD

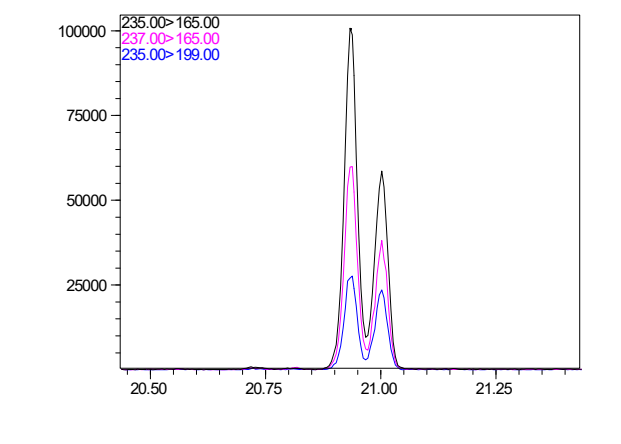

cis-Nonachlor

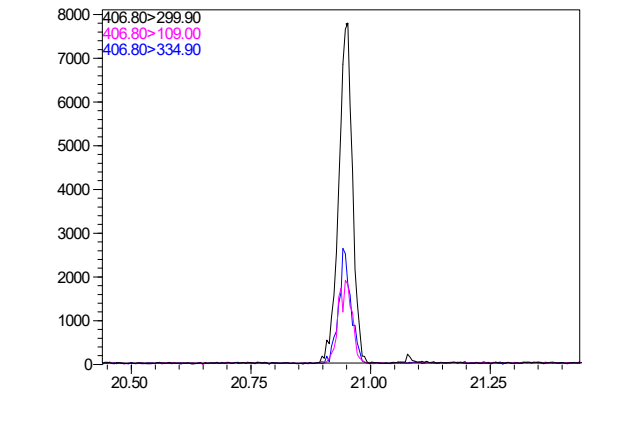

o,p'-DDT

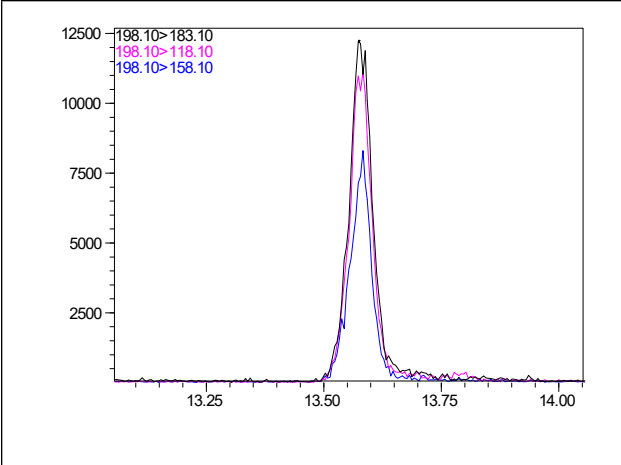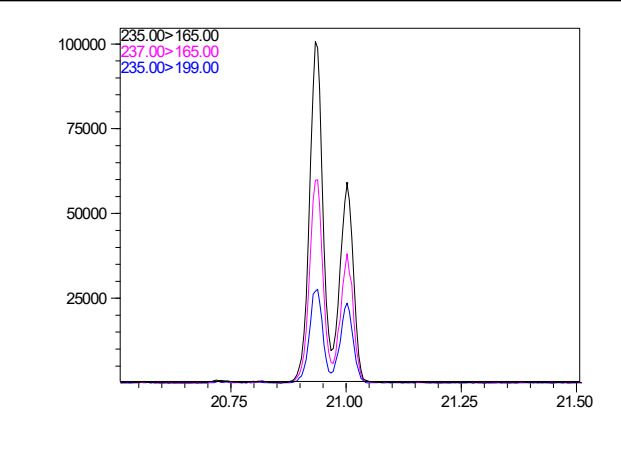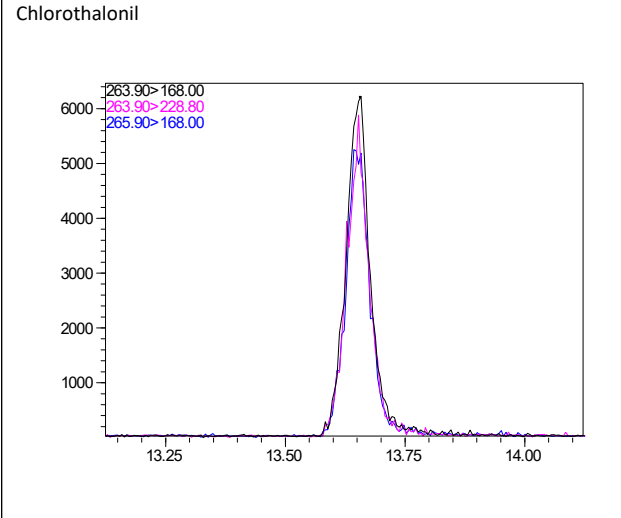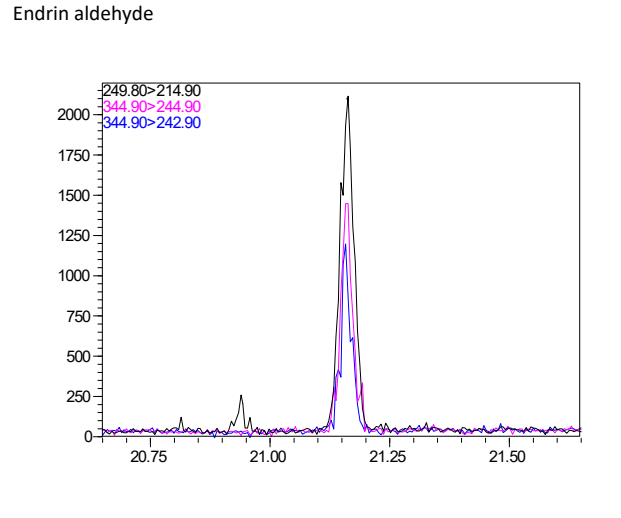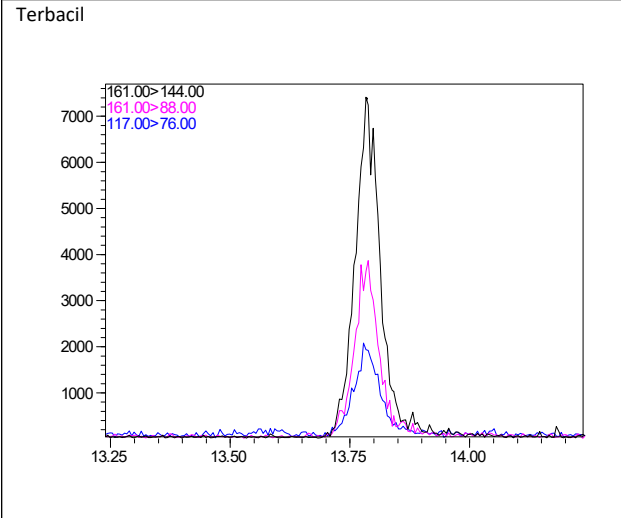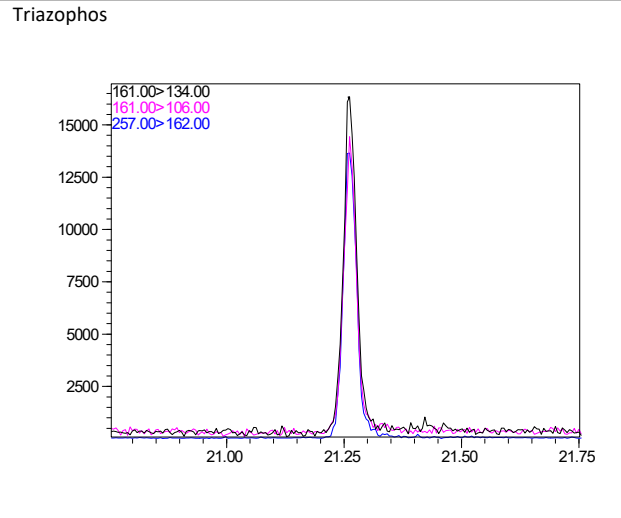

Disulfoton

Sulprofos

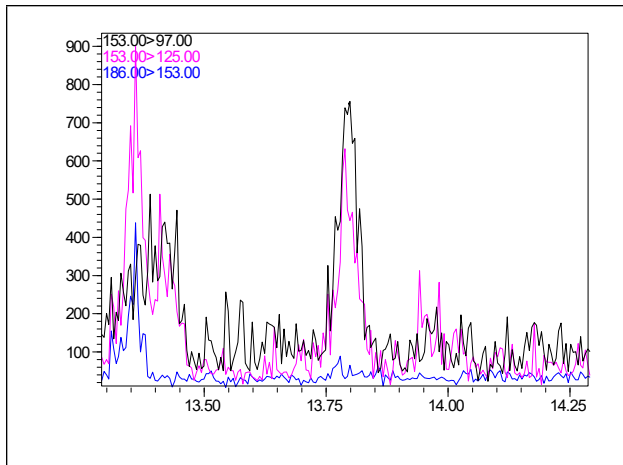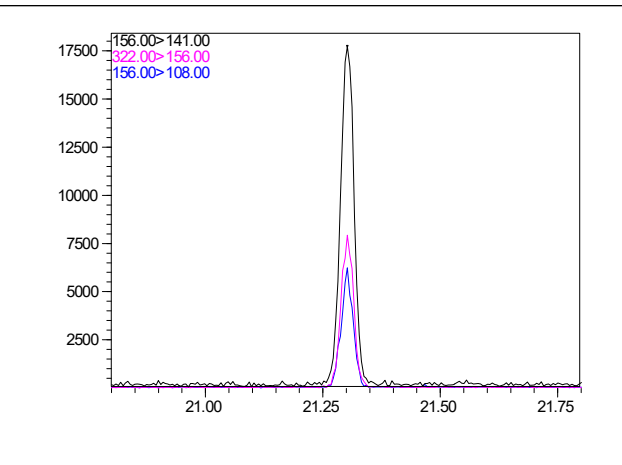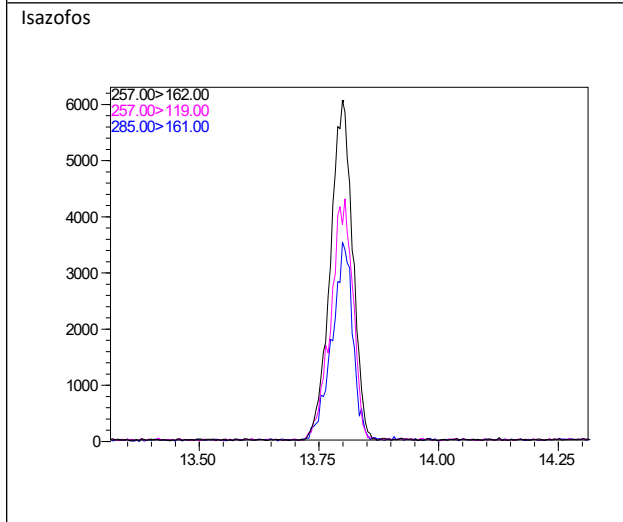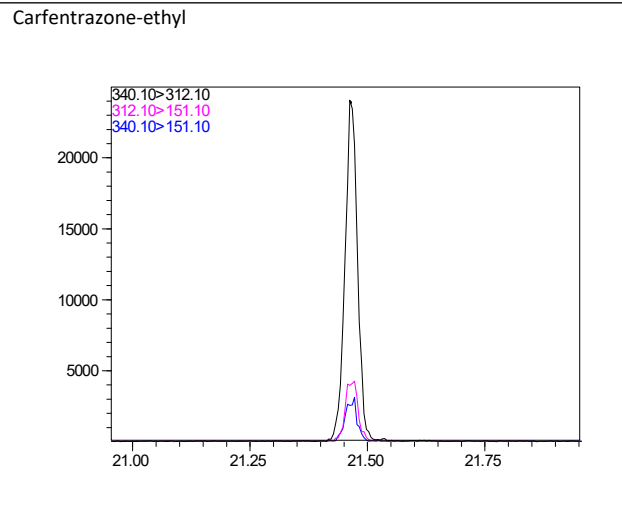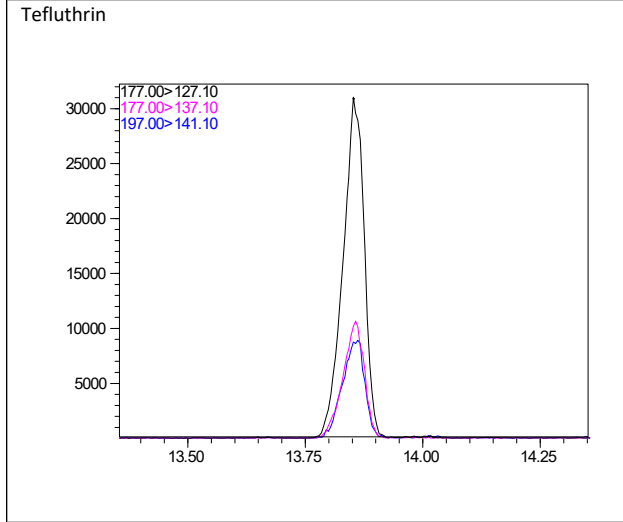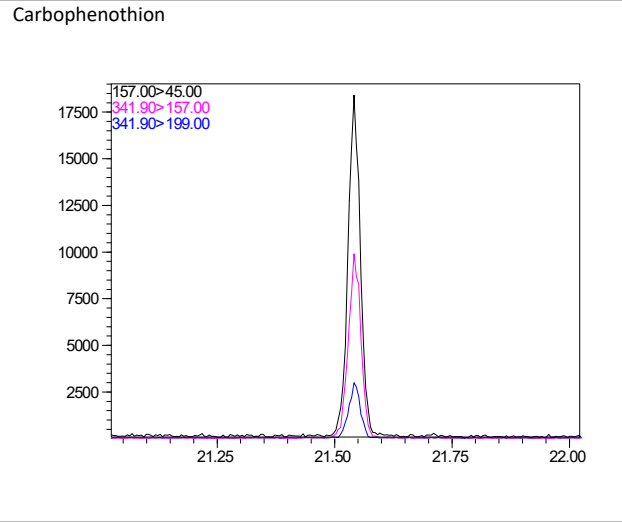

delta-BHC

4,4'-methoxychlor olefin

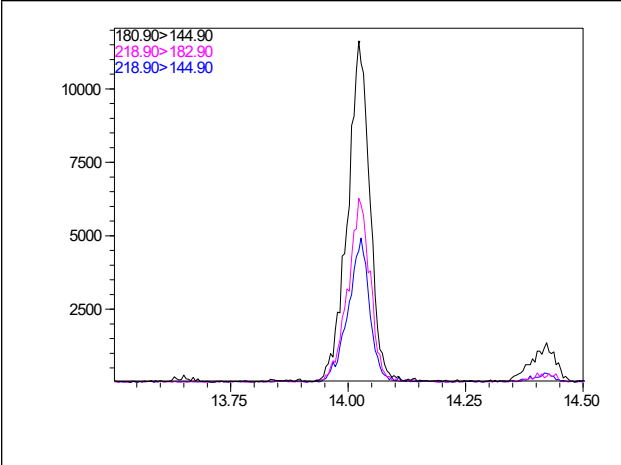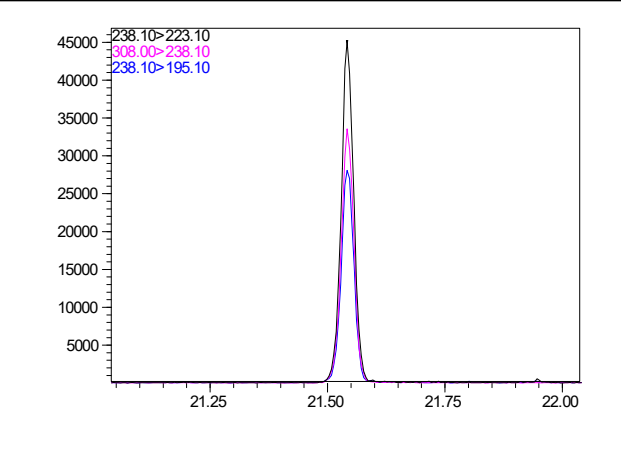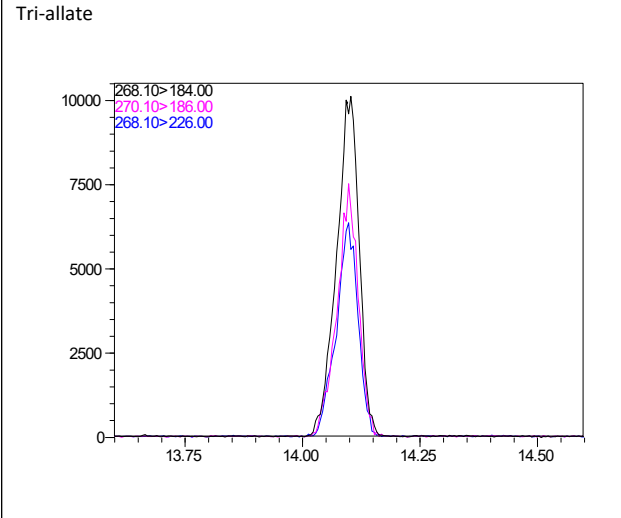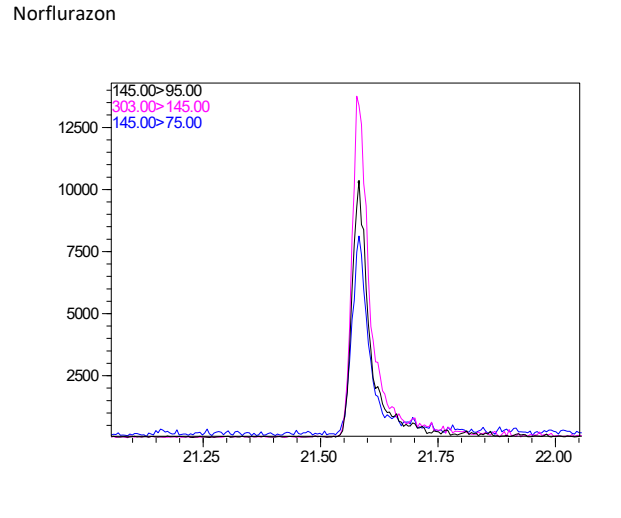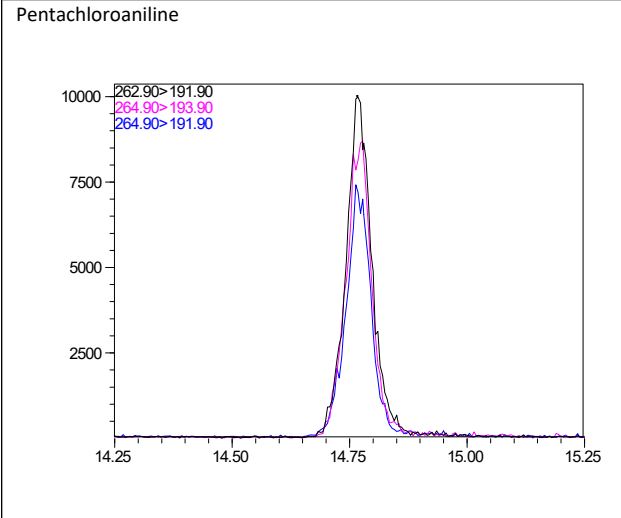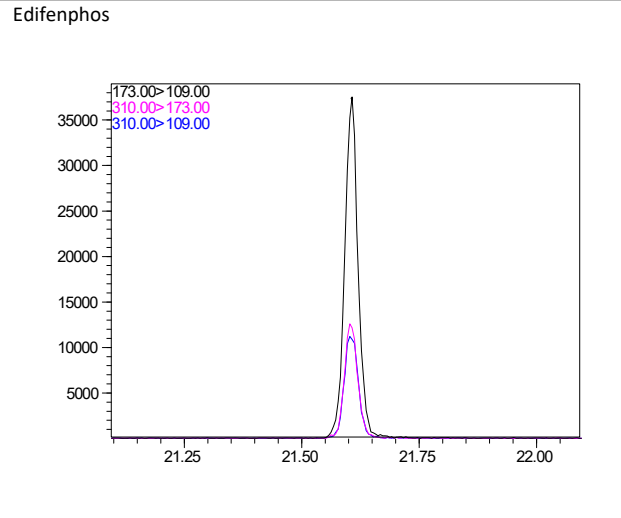

alpha-Endosulfan

Lenacil

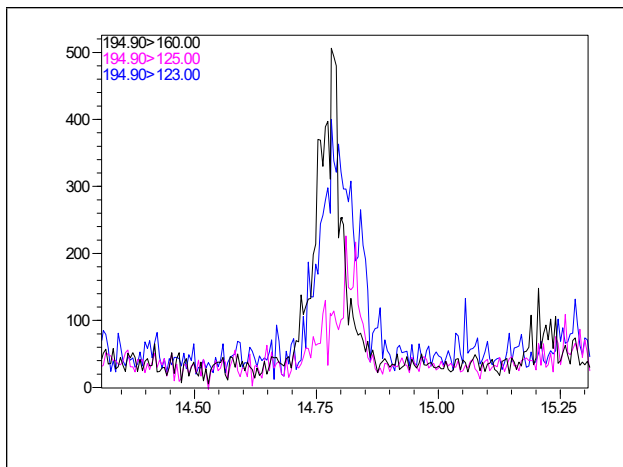

Endosulfan ether

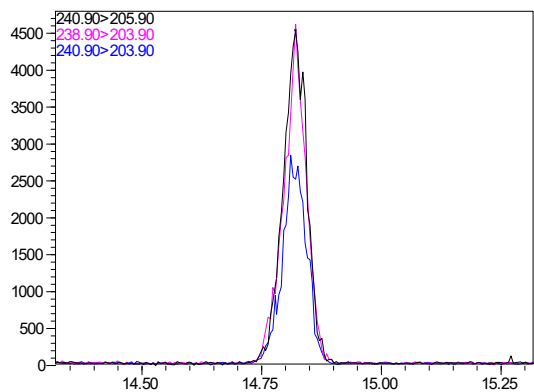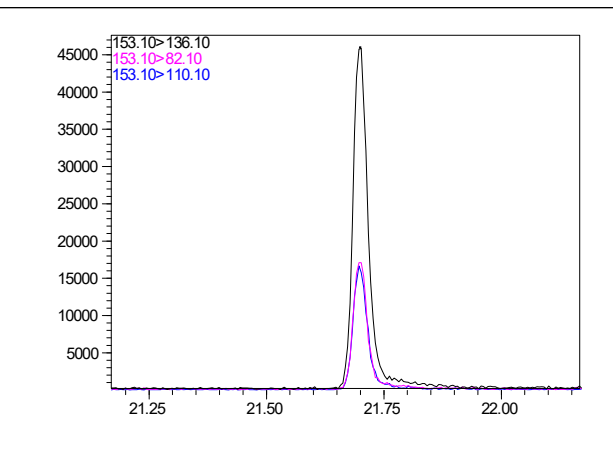

Endosulfan sulfate

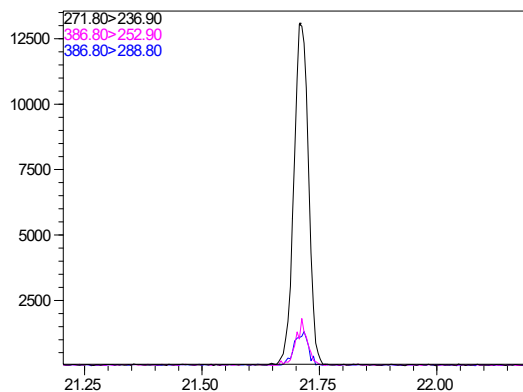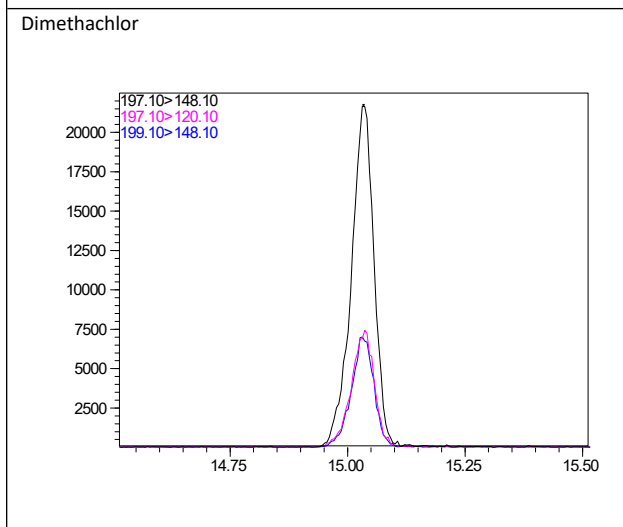

Propanil

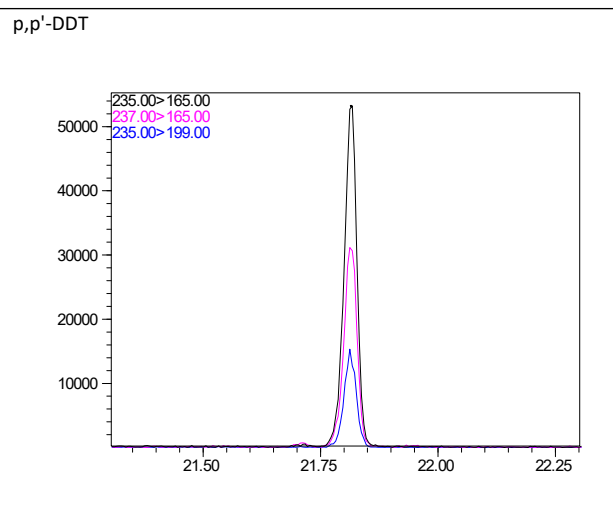

Hexazinone

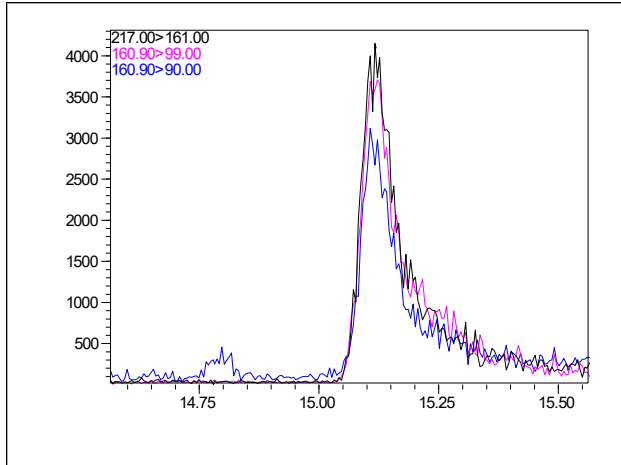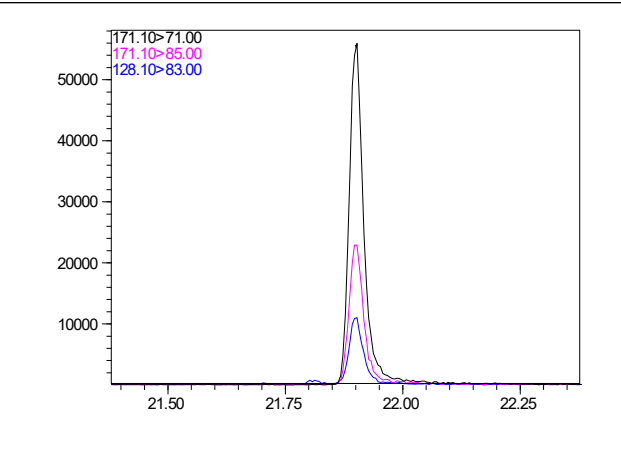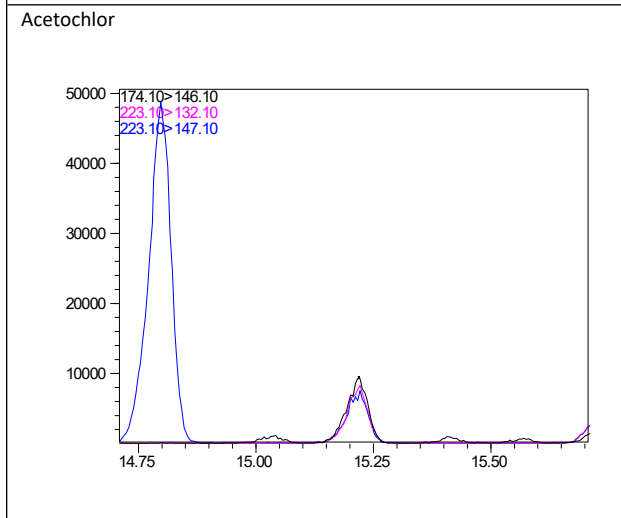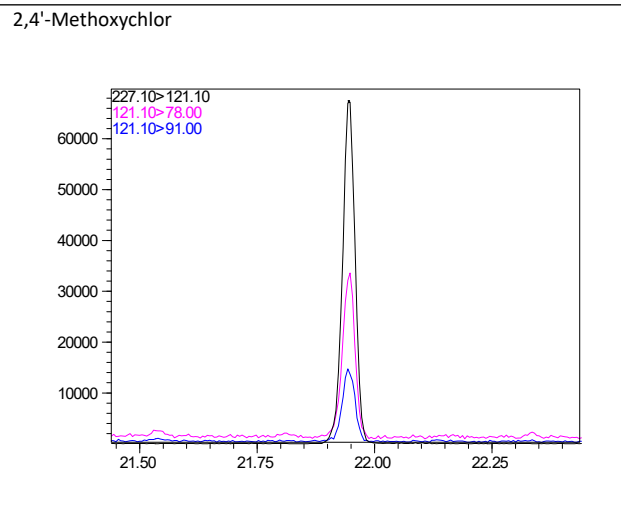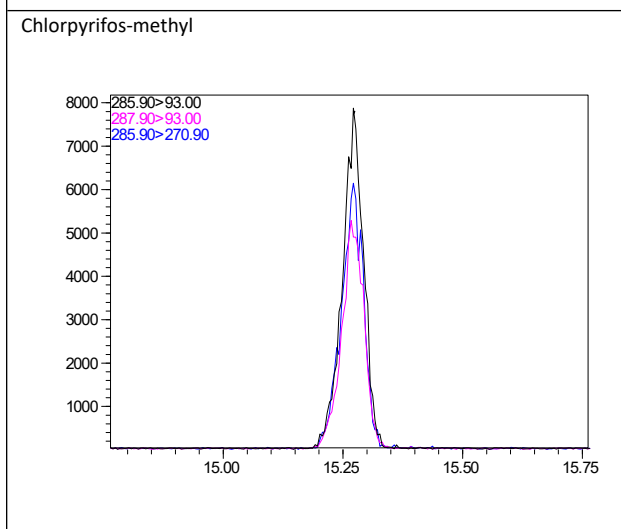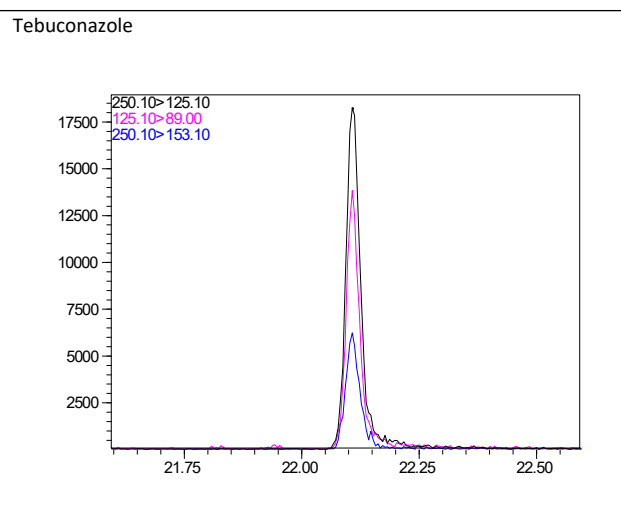

Vinclozolin

Propargite

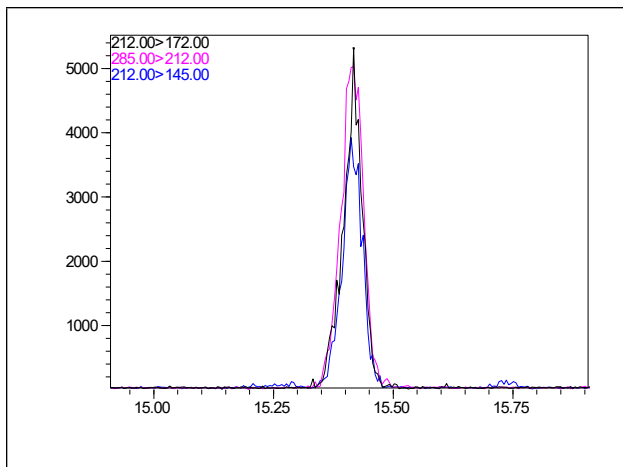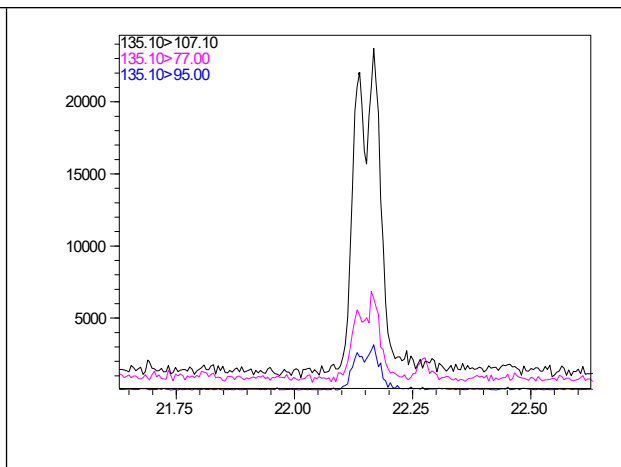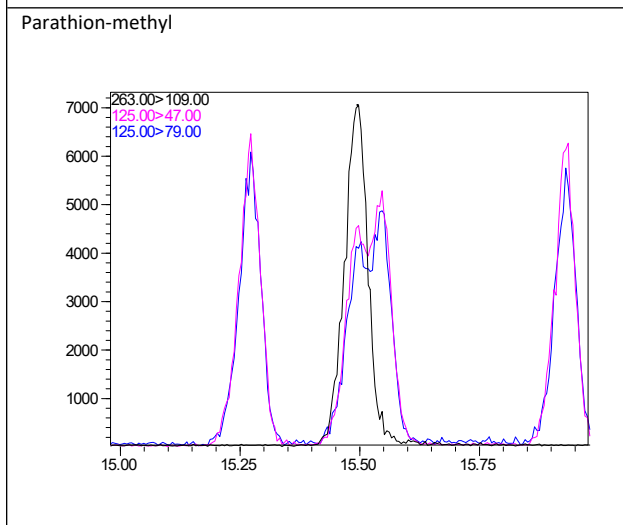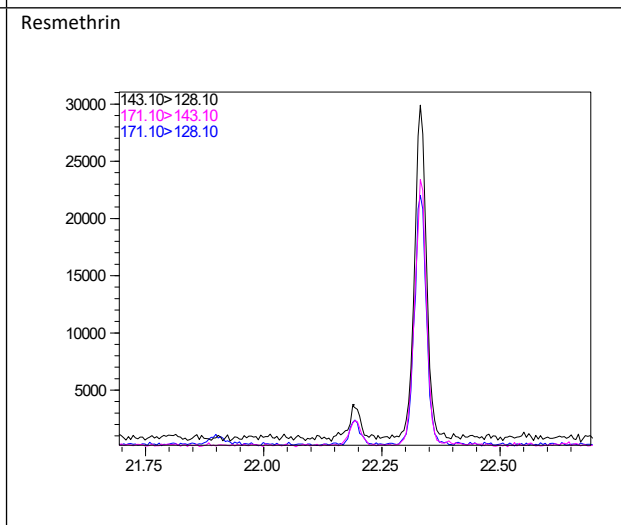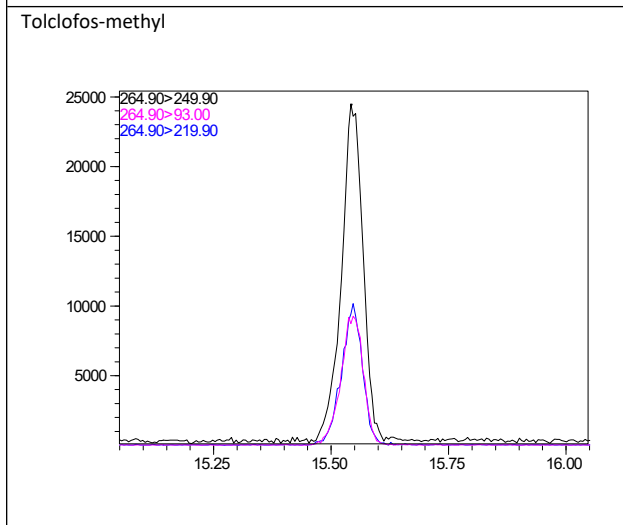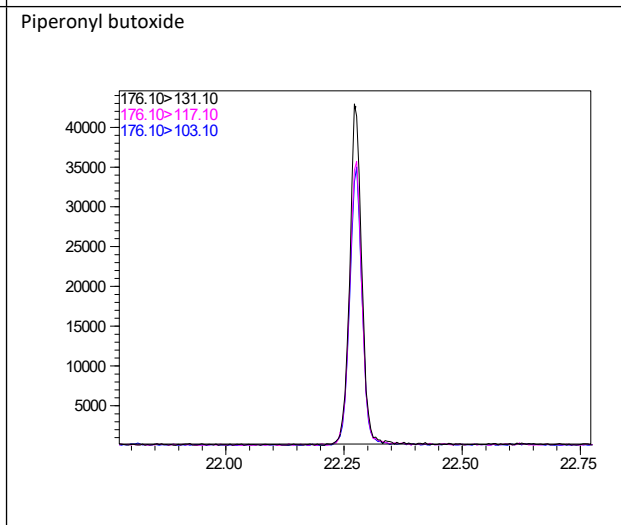

Alachlor

Nitralin



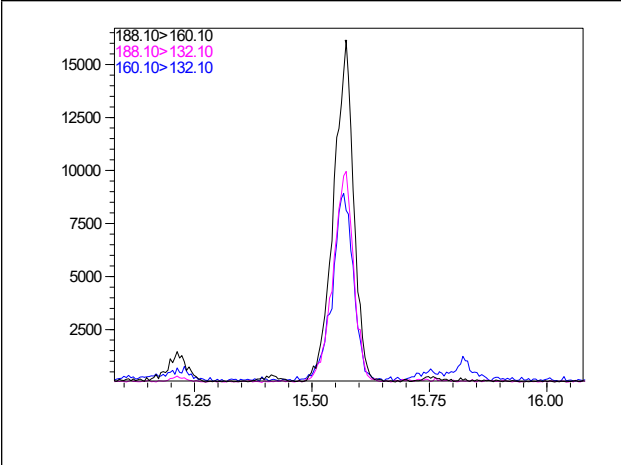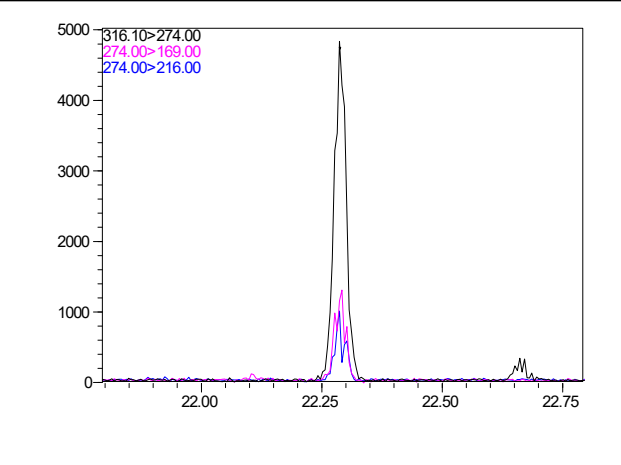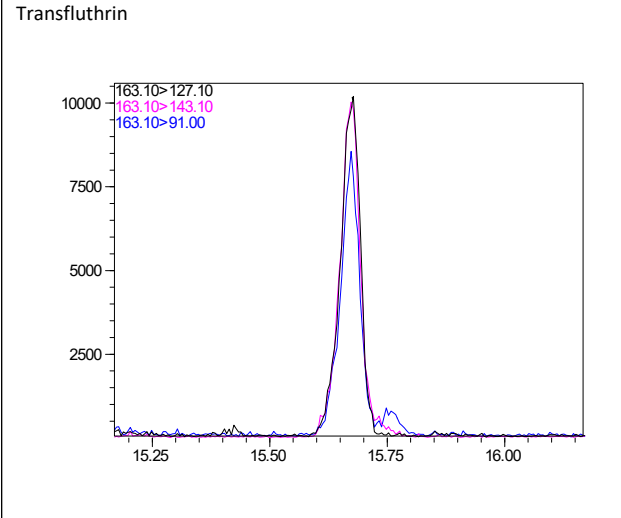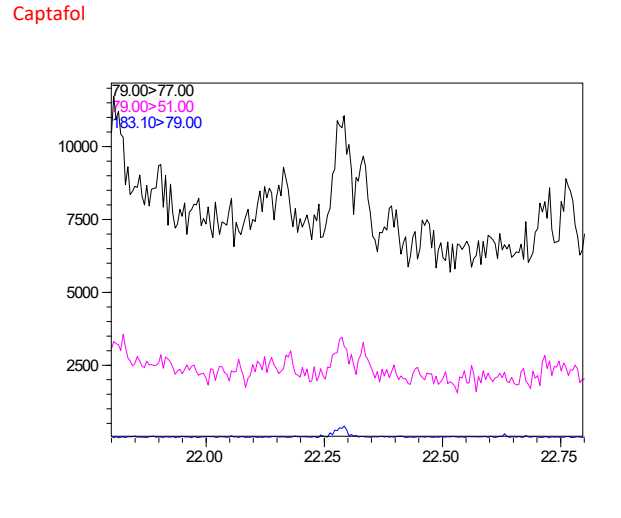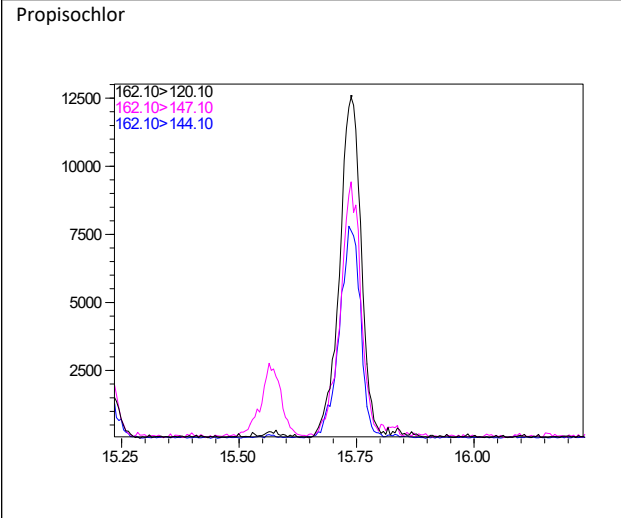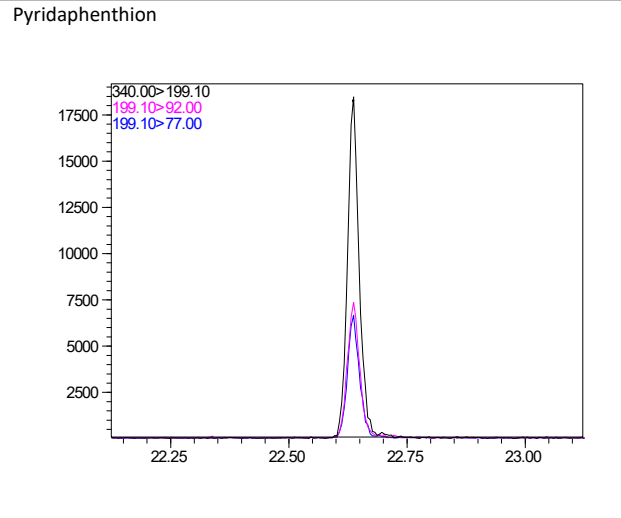

Metalaxyl

Iprodione

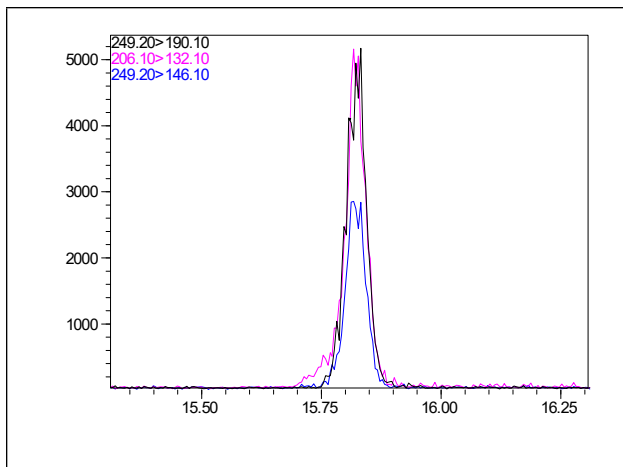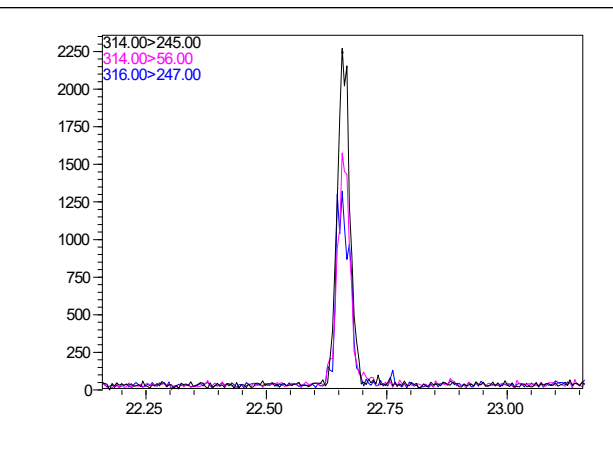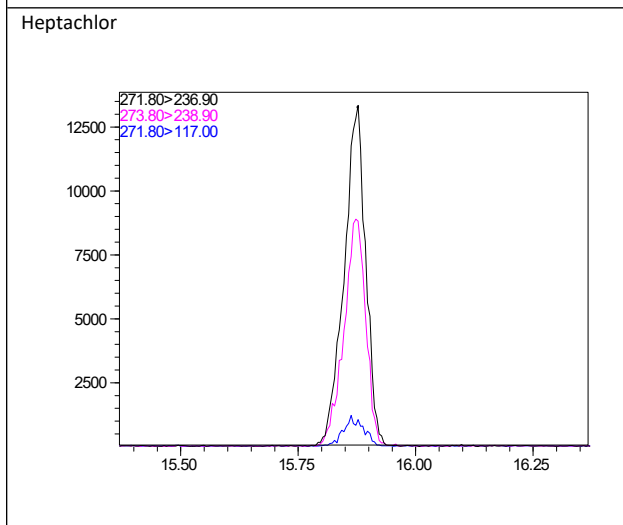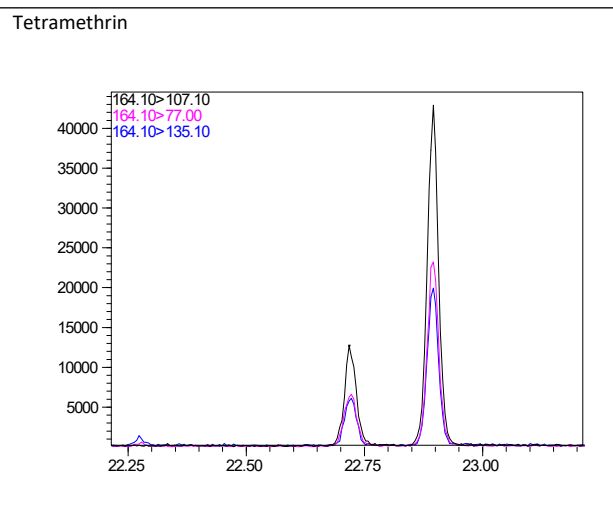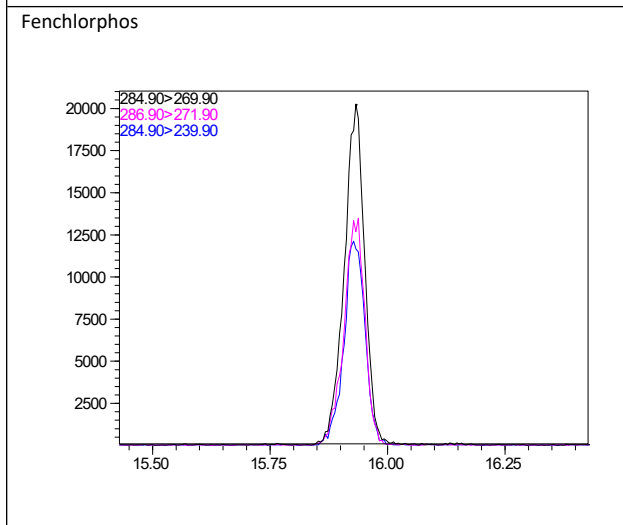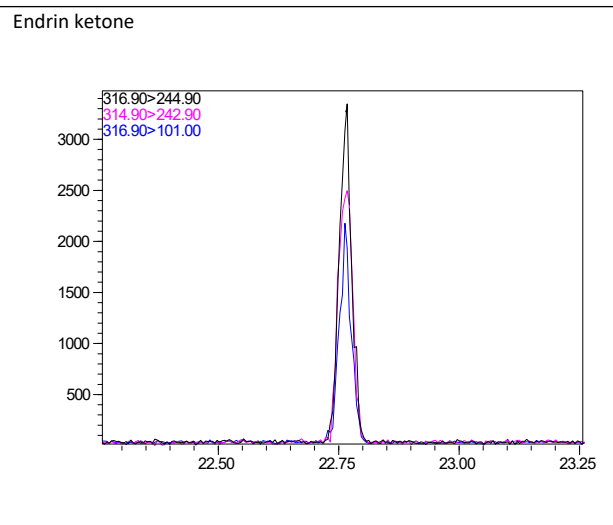

Pirimiphos-methyl

Phosmet

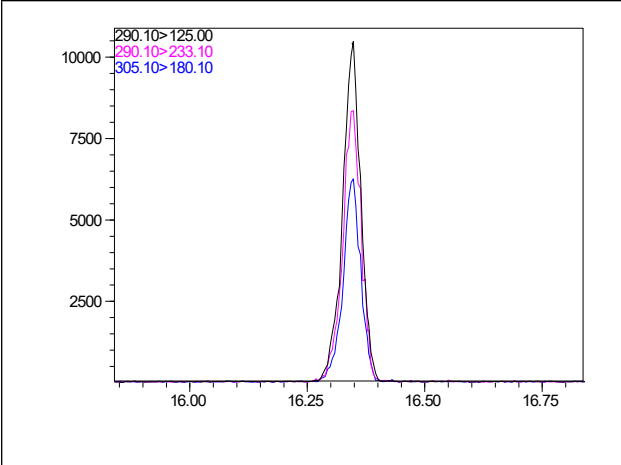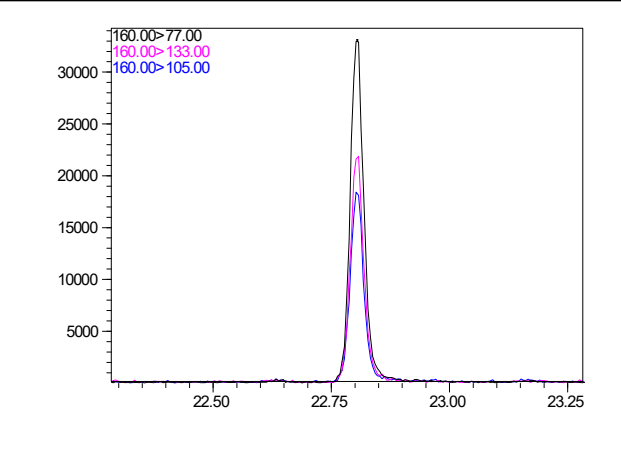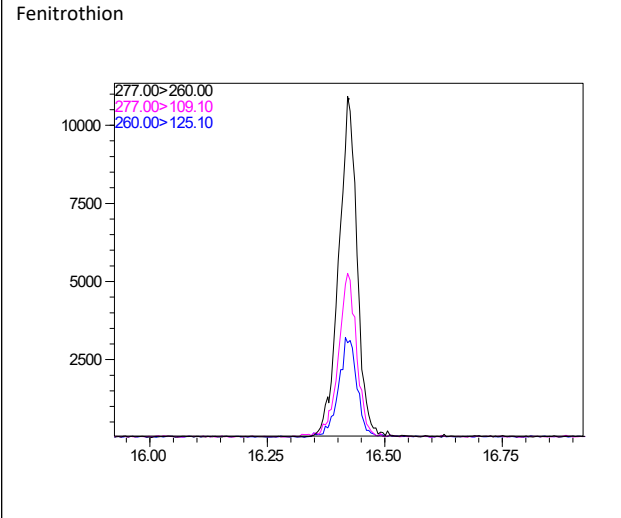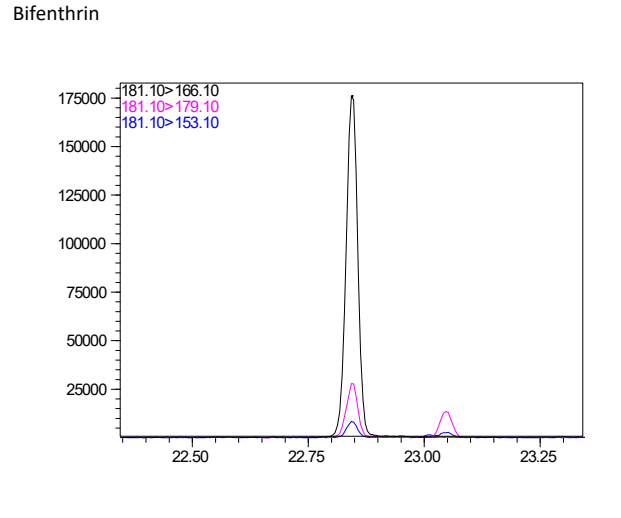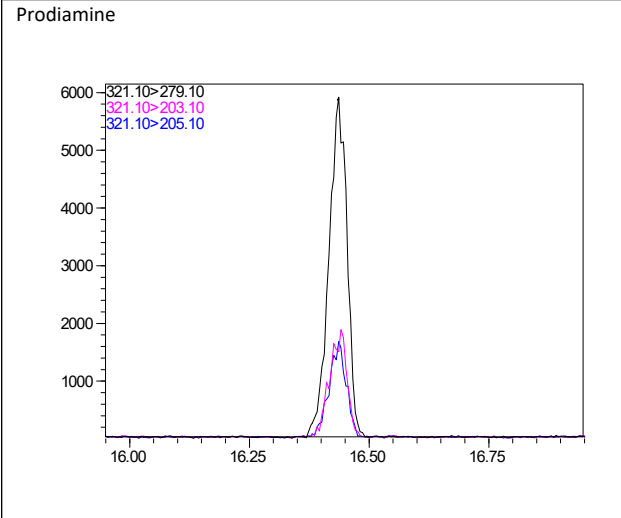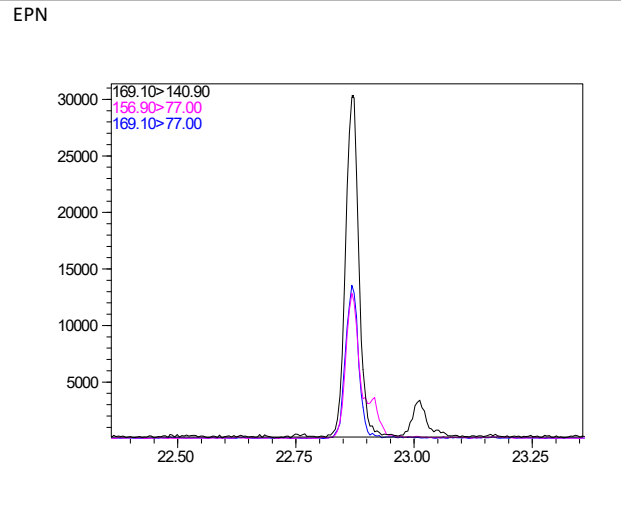

Linuron

Bromopropylate

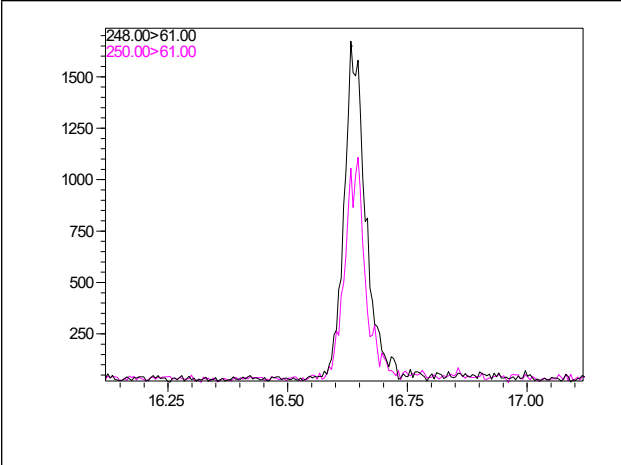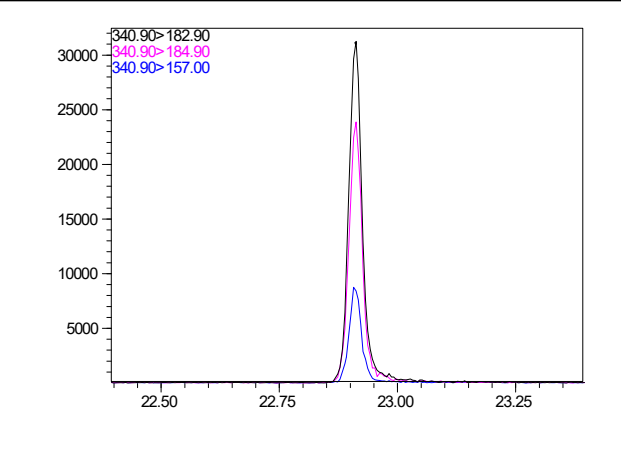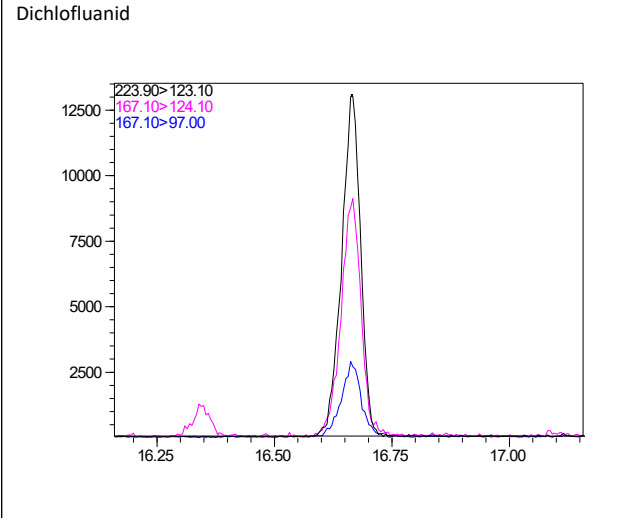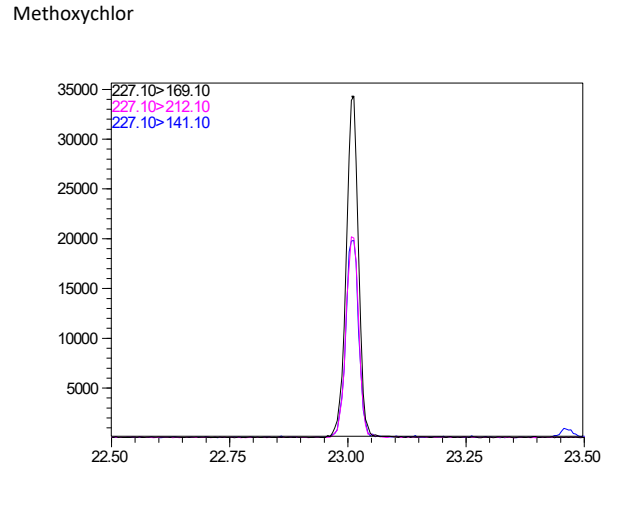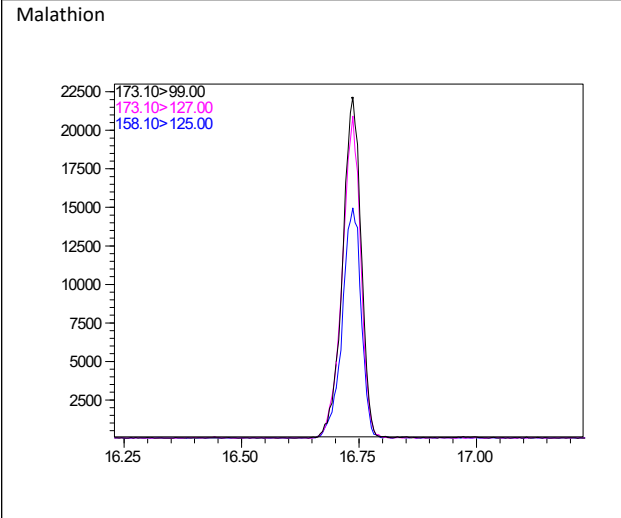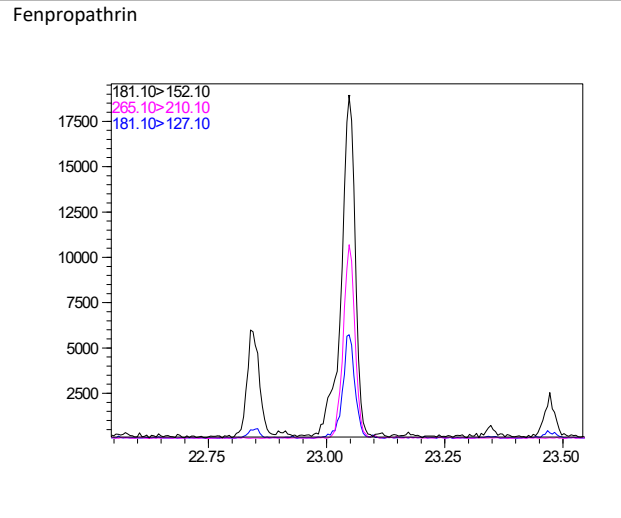

Metolachlor

Tebufenpyrad

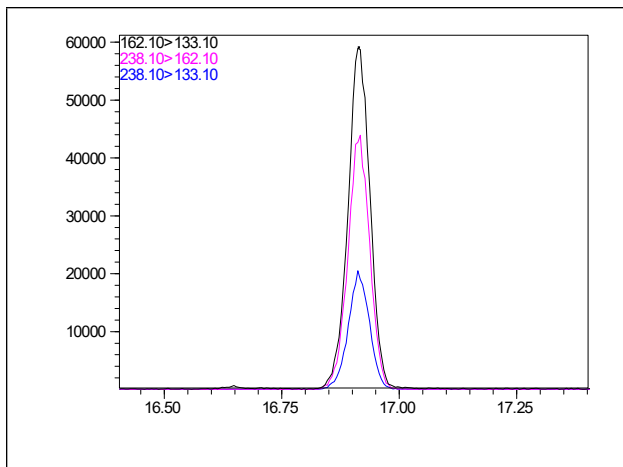

Chlorpyrifos

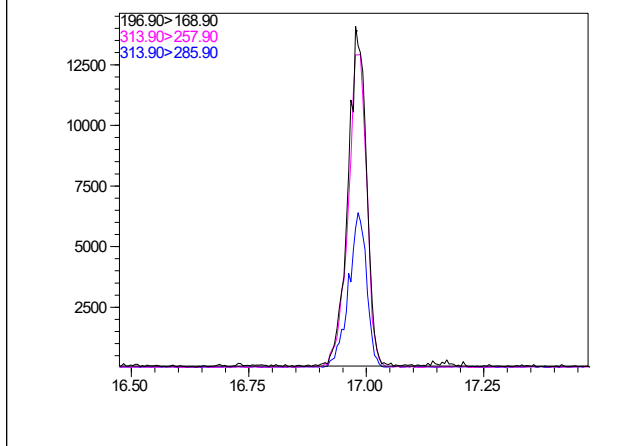

Fenthion

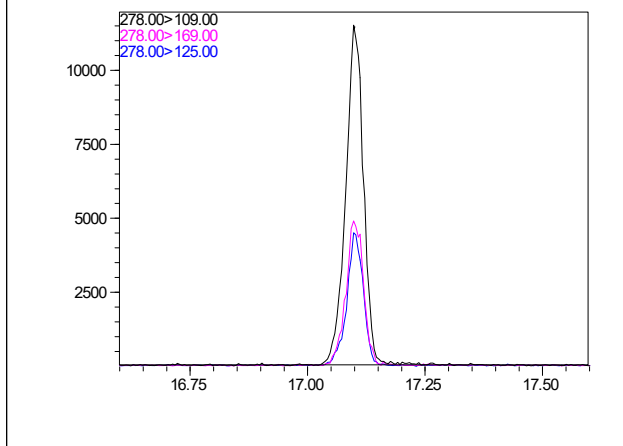

Anthraquinone

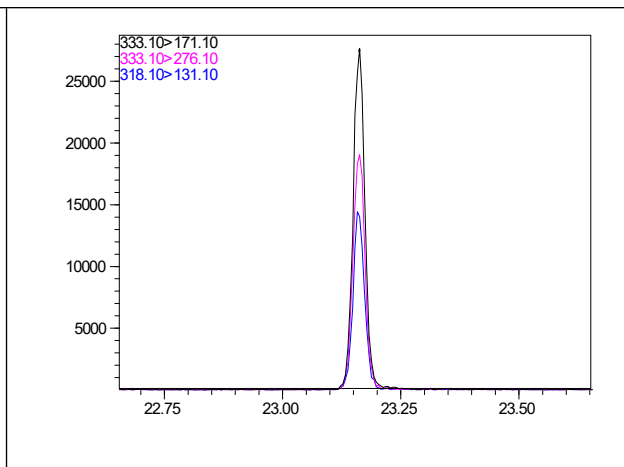

Phosalone

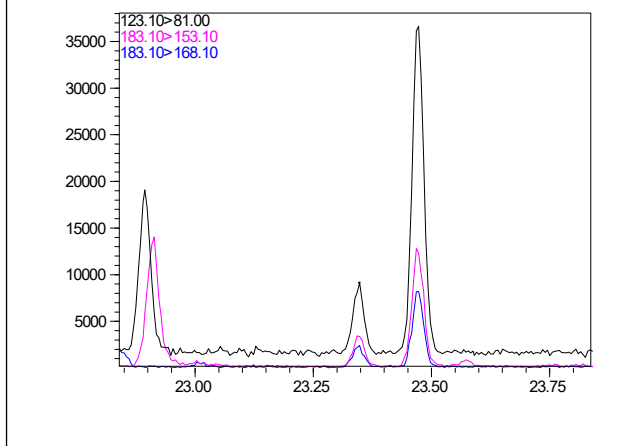

Tetradifon

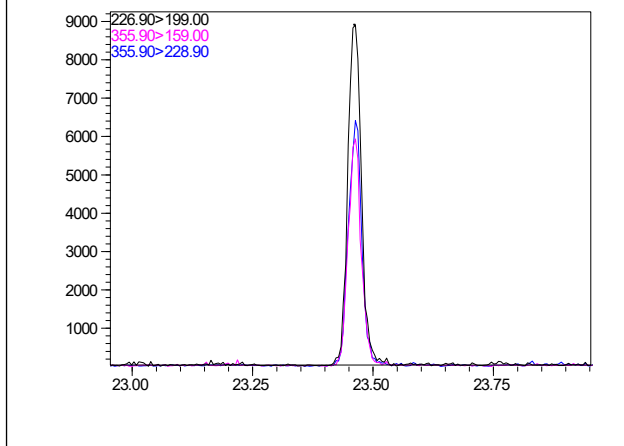

Phosalone

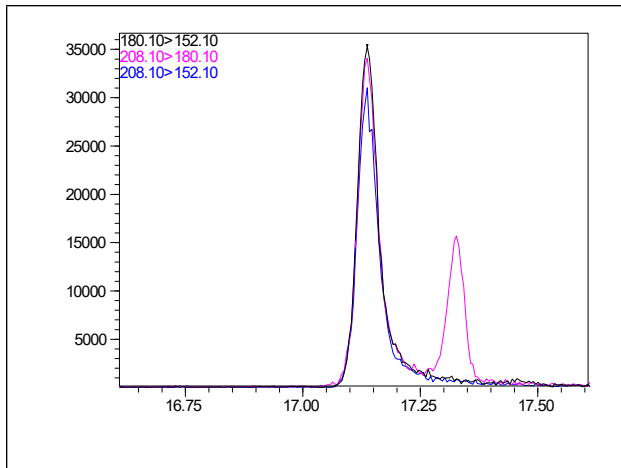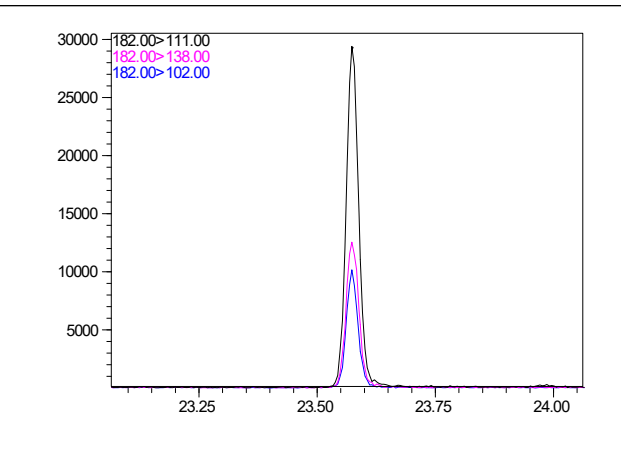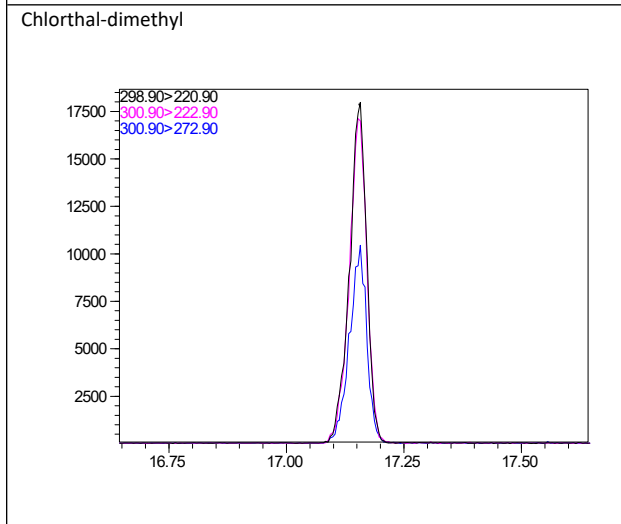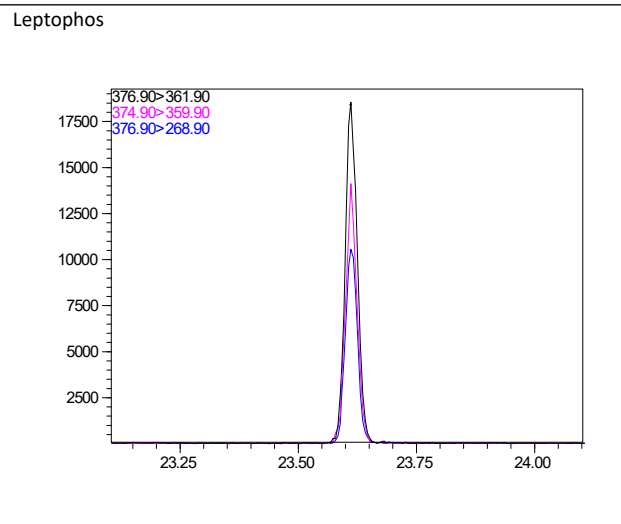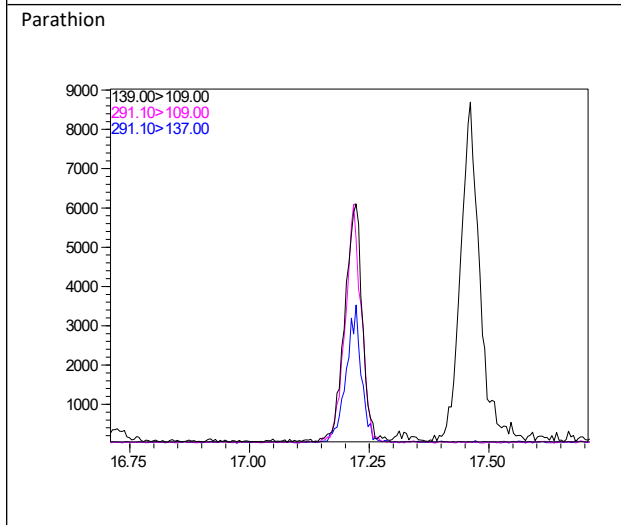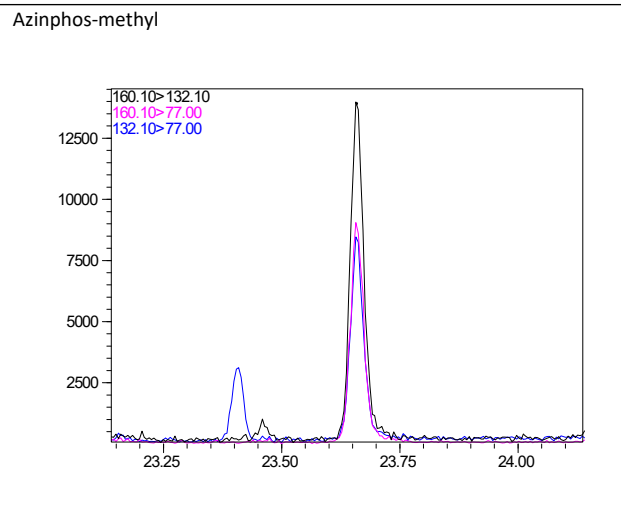

Triadimefon

Pyriproxyfen

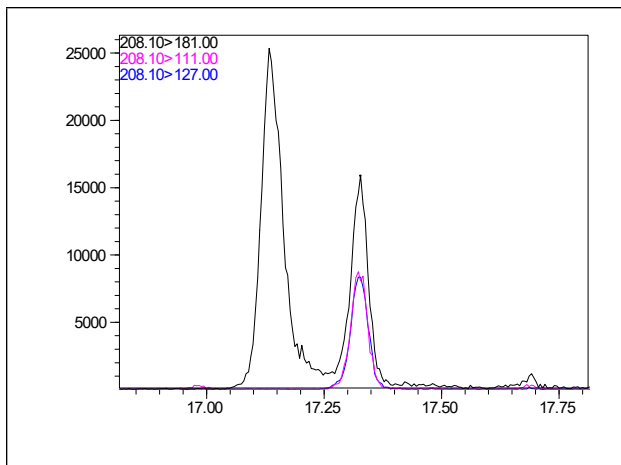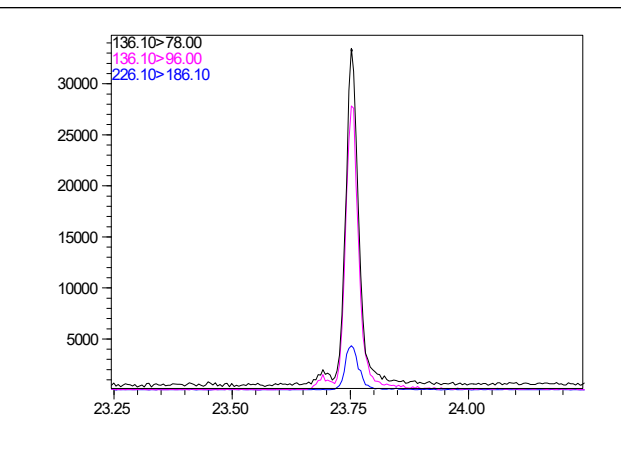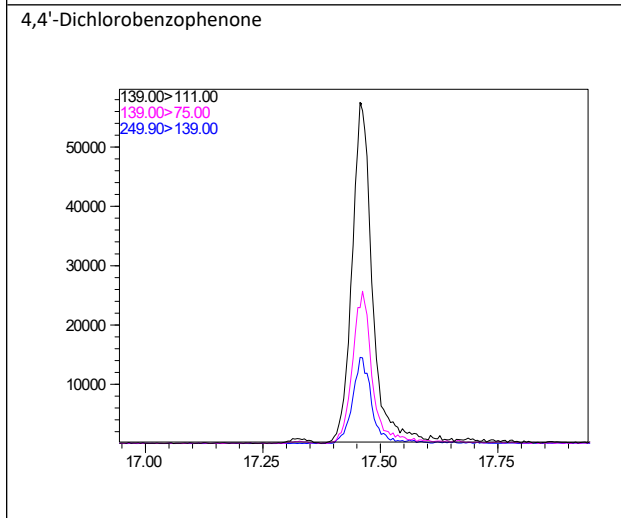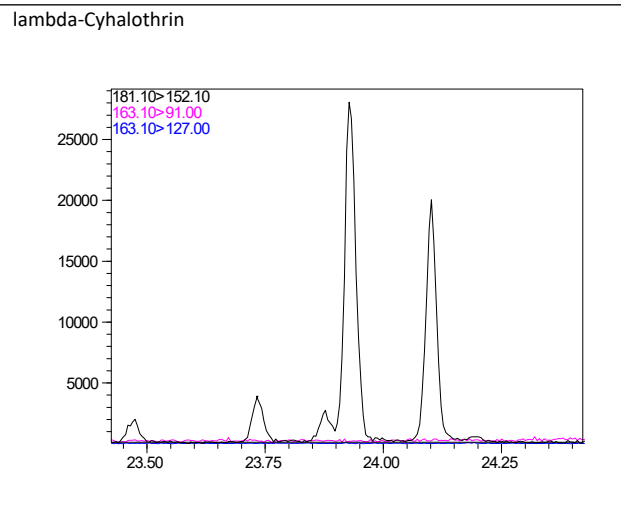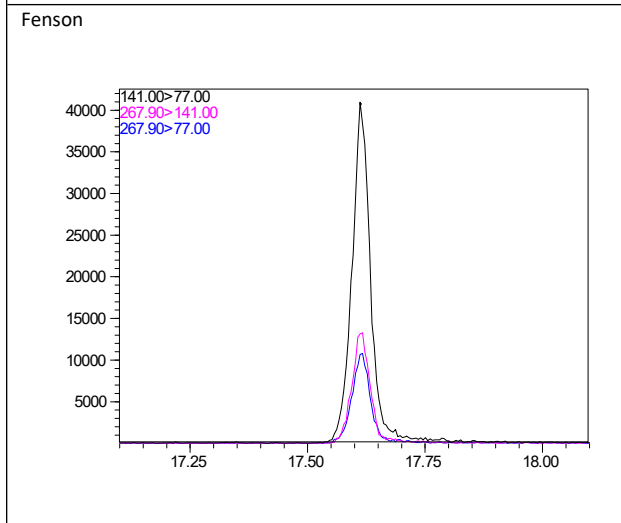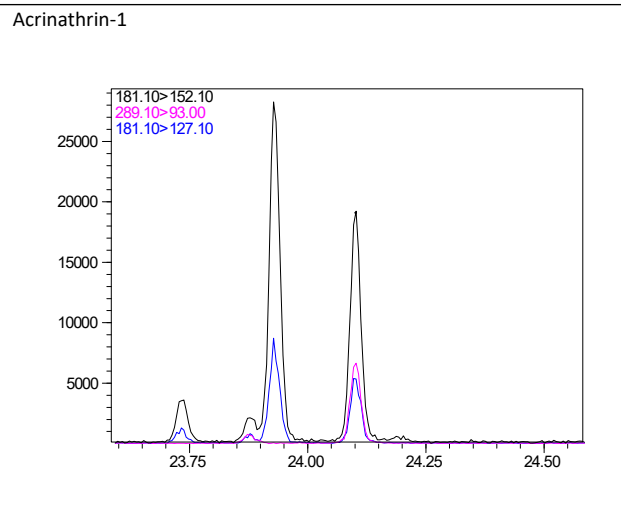

Bromophos

Mirex

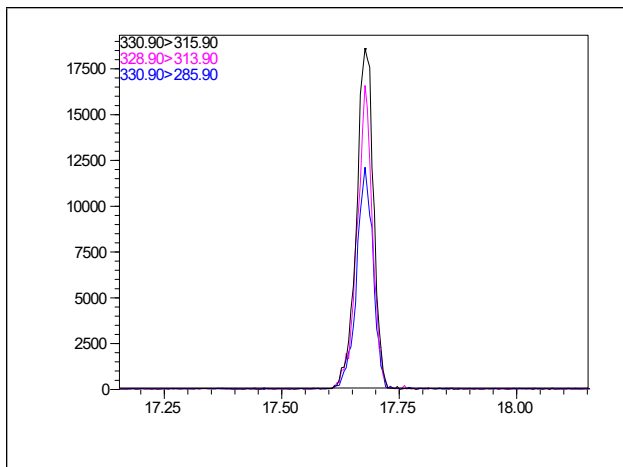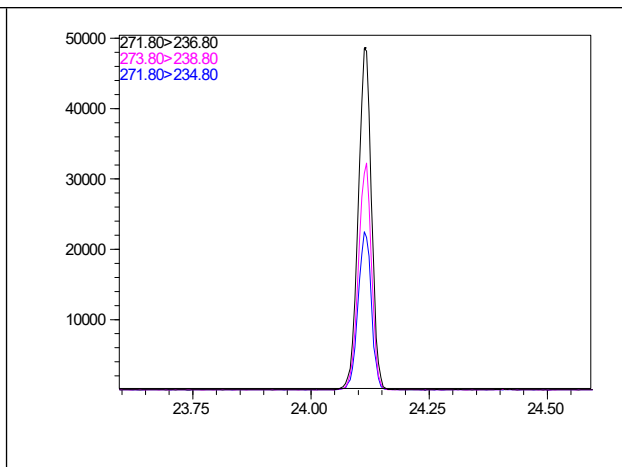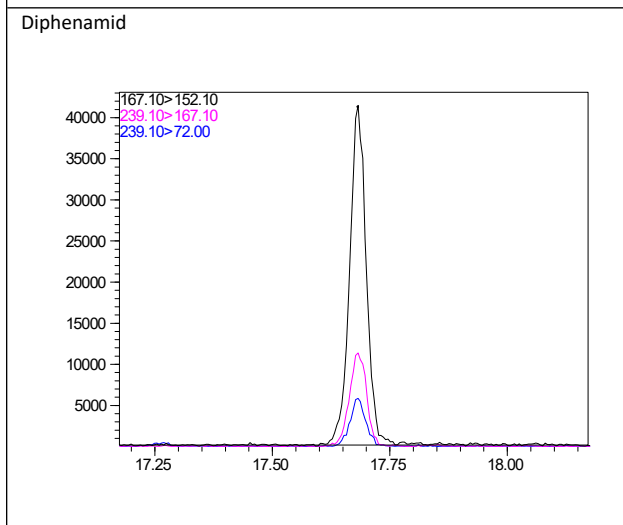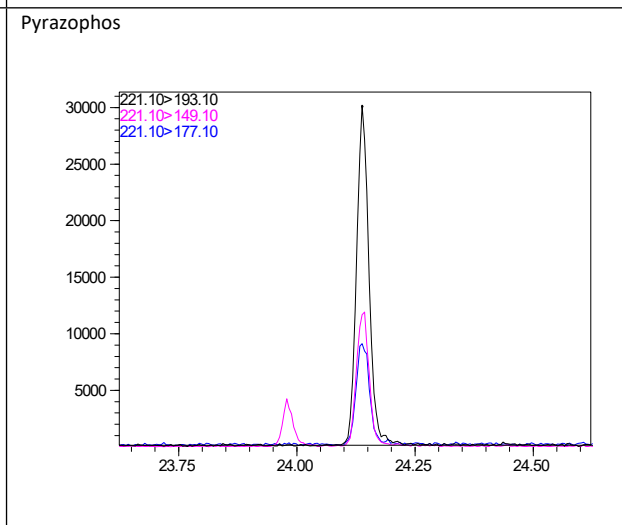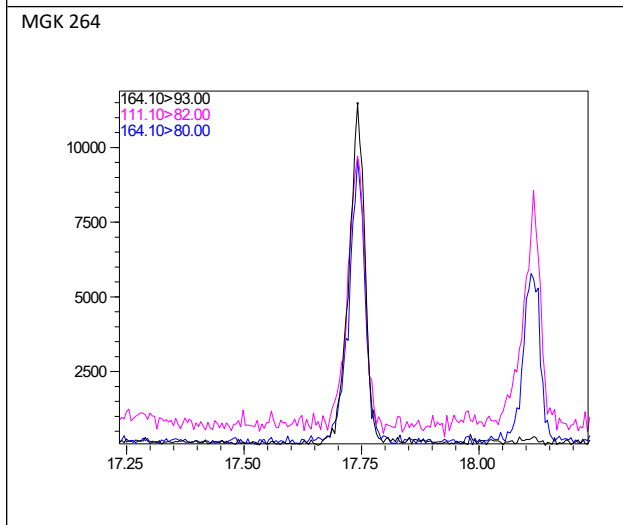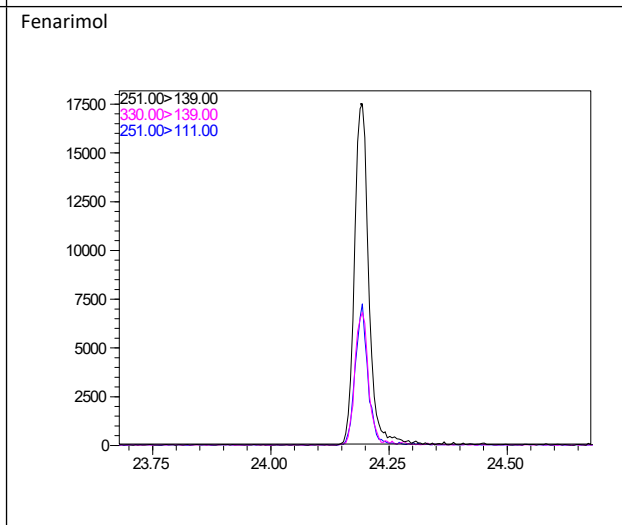

Isopropalin

Azinphos-ethyl



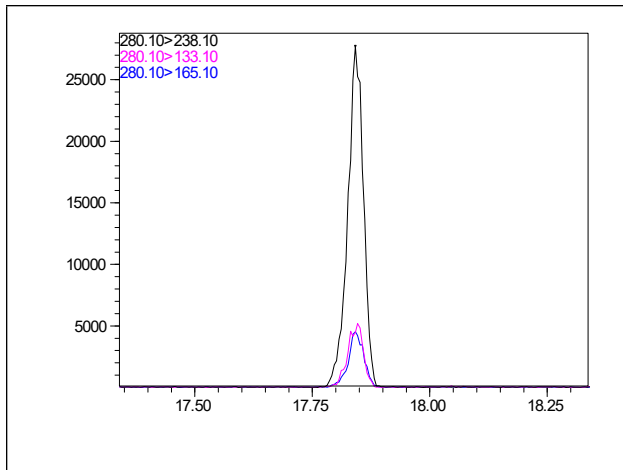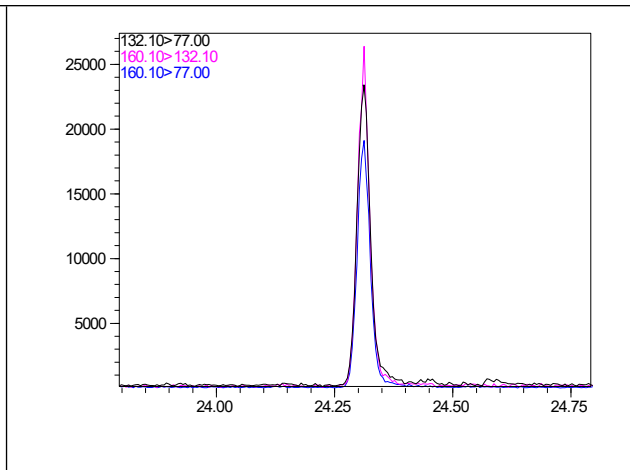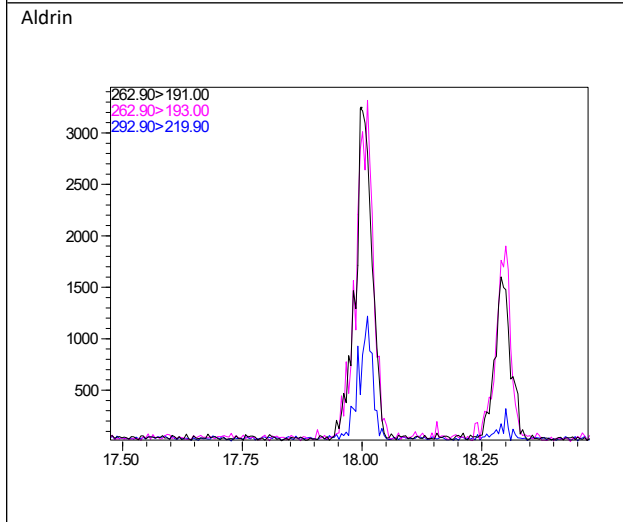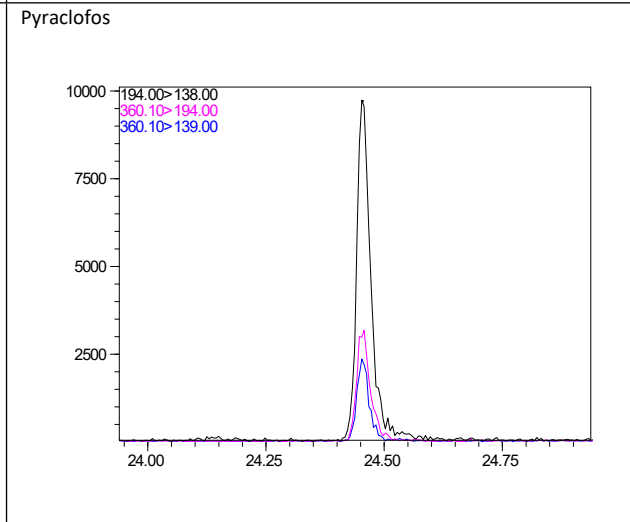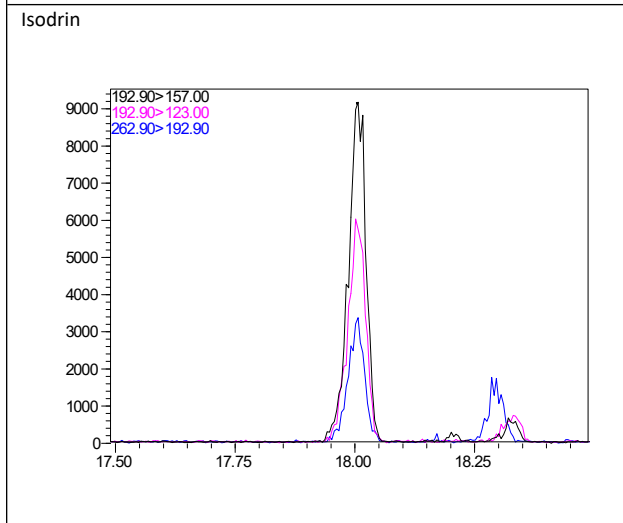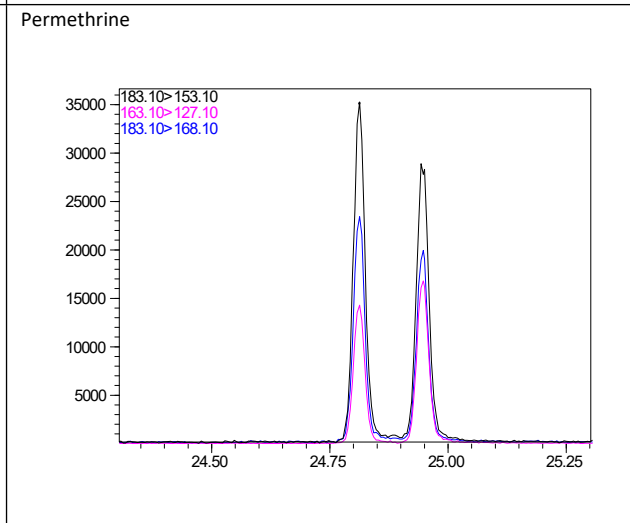

Pirimiphos ethyl

Coumaphos

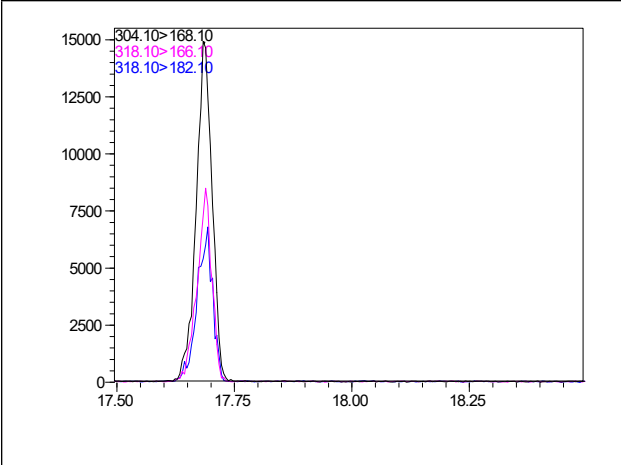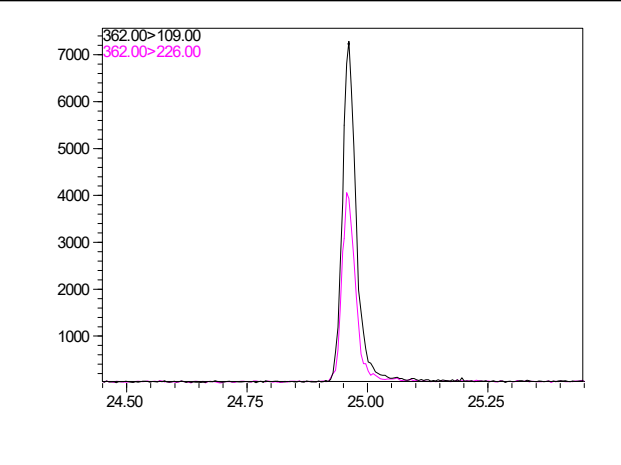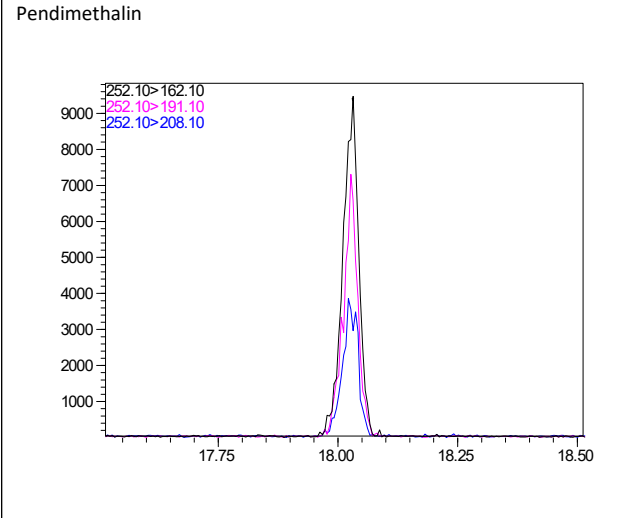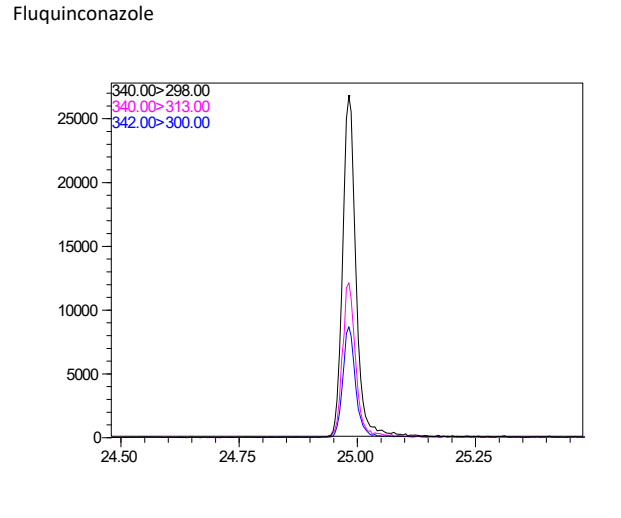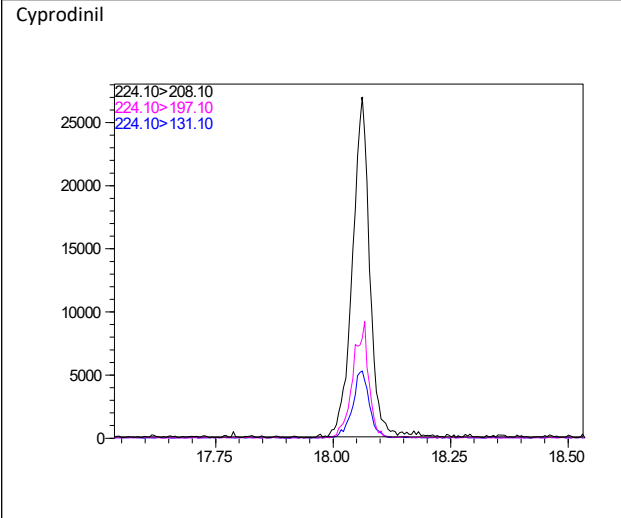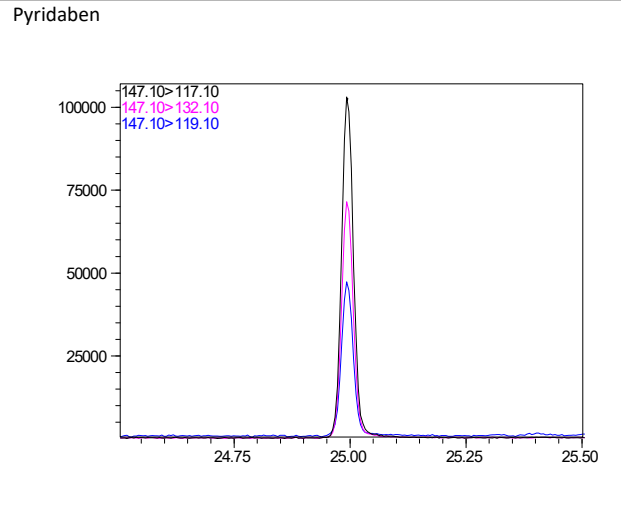

Metazachlor

Prochloraz

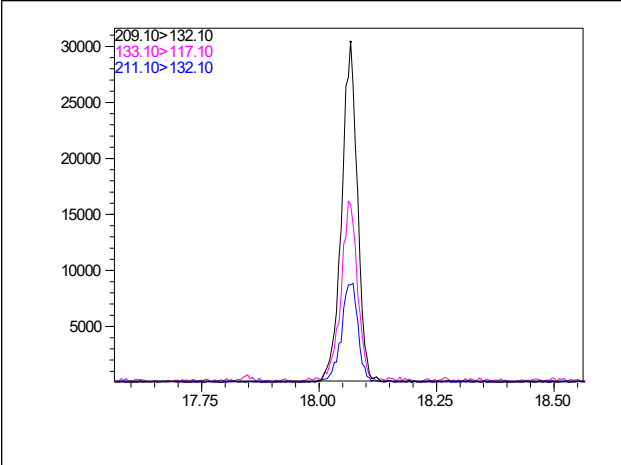

Fipronil

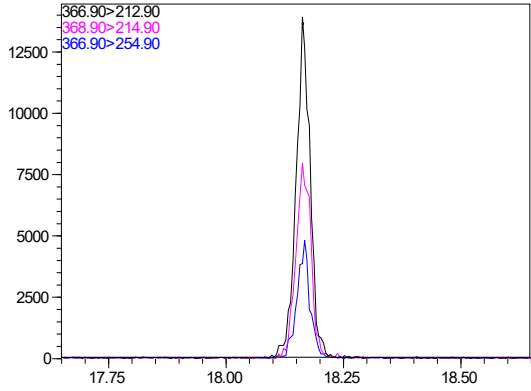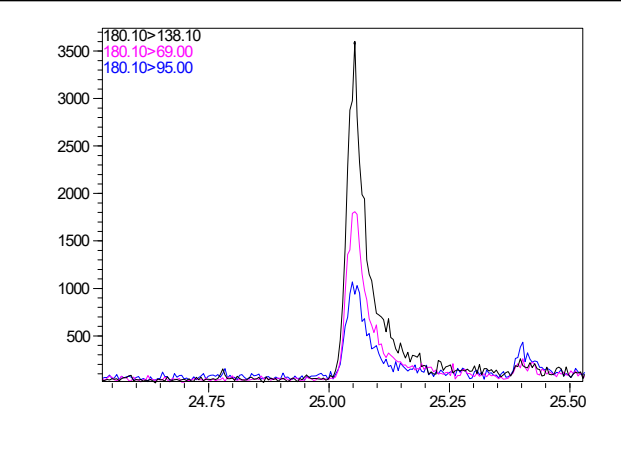

Cyfluthrin

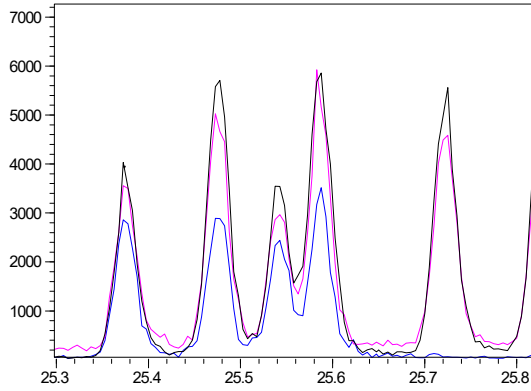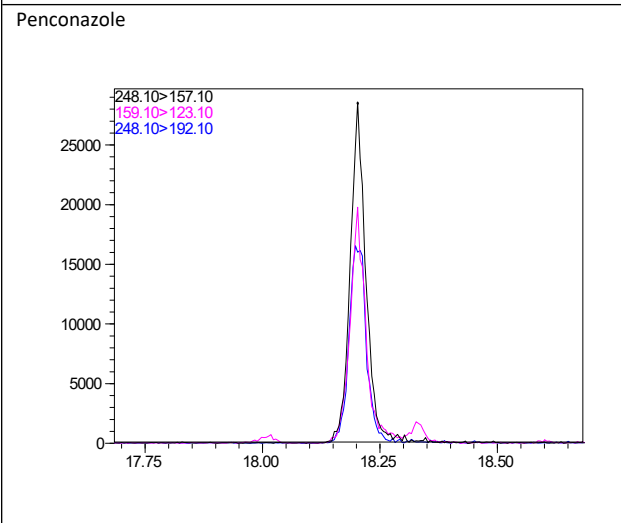

Chlozolinate

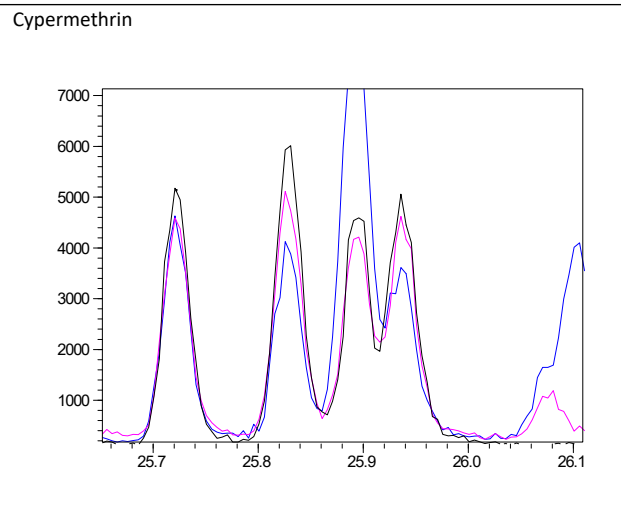

Flucythrinate

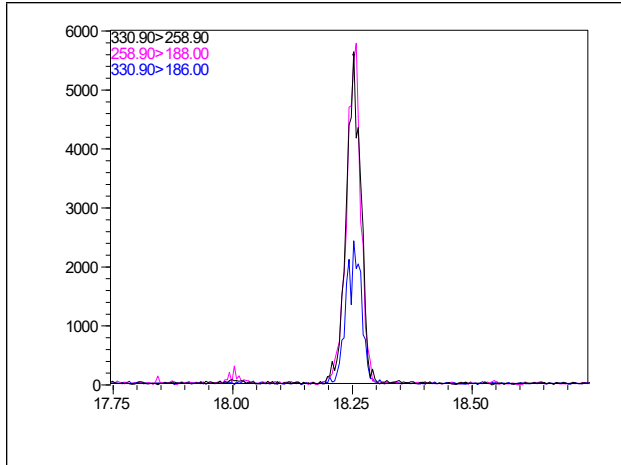

Tolyfluanid

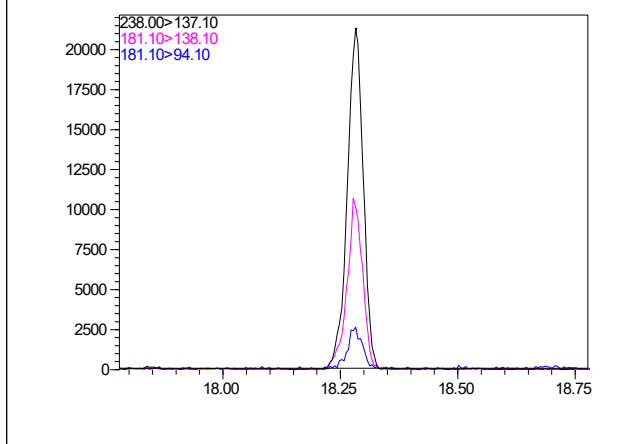

Heptachlor-exo-epoxide

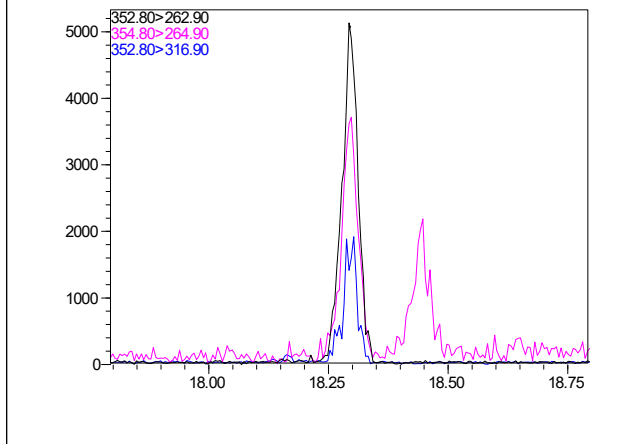

(E)-Chlorfenvinphos

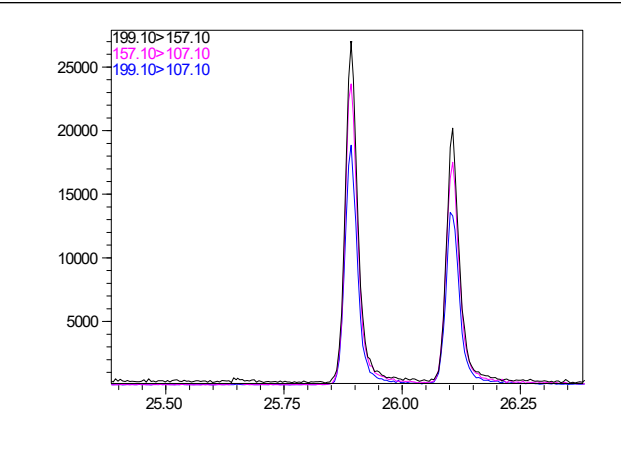

Acequinocyl

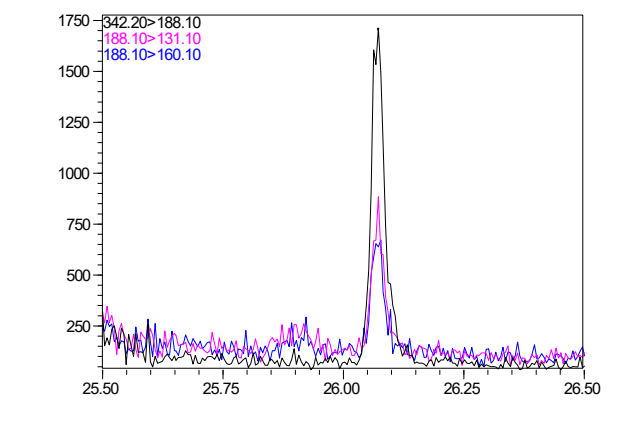

Etofenprox

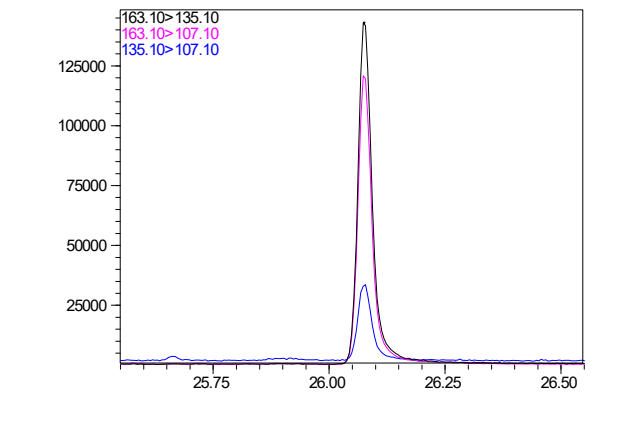

Fluridone

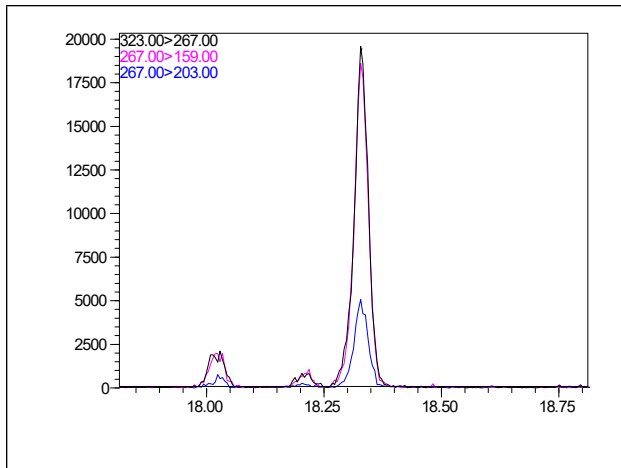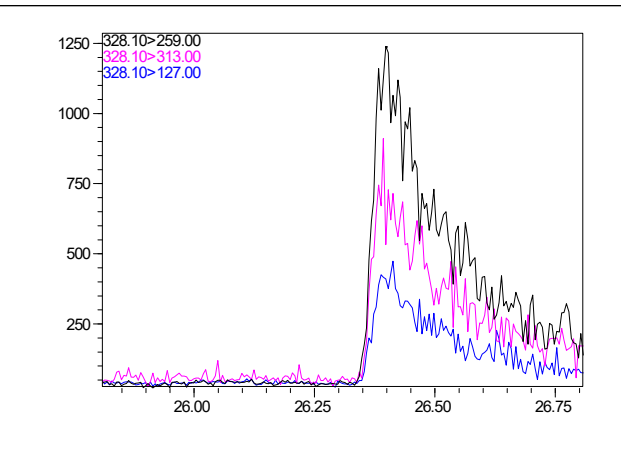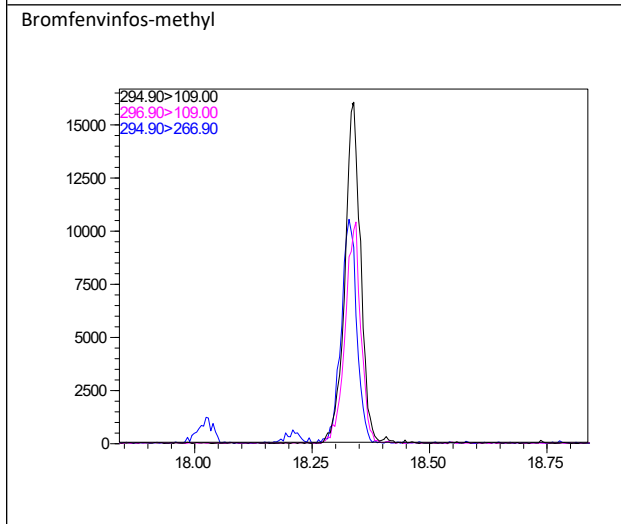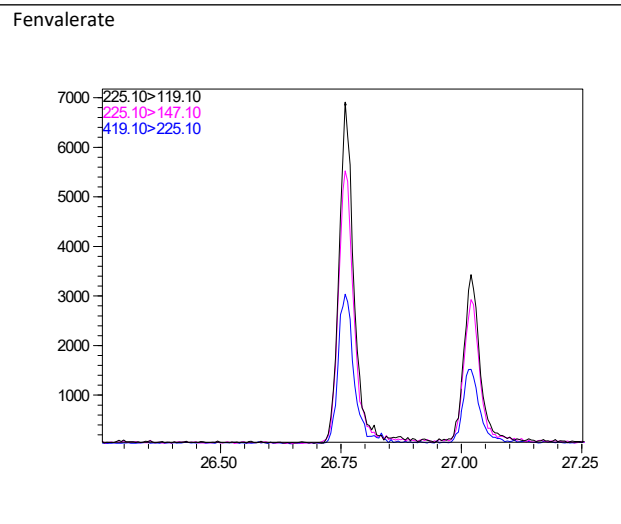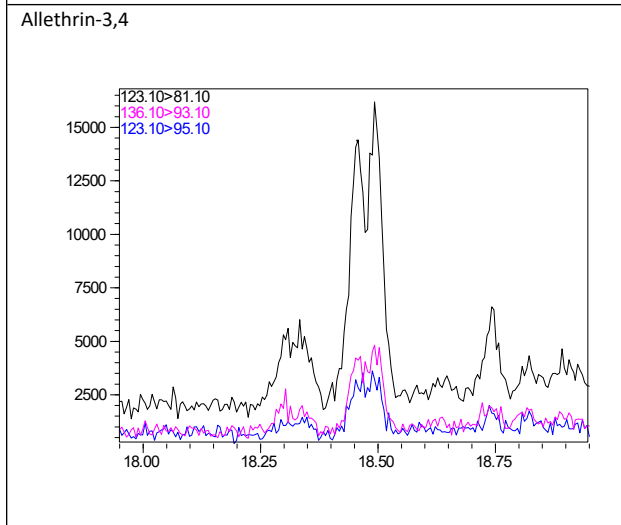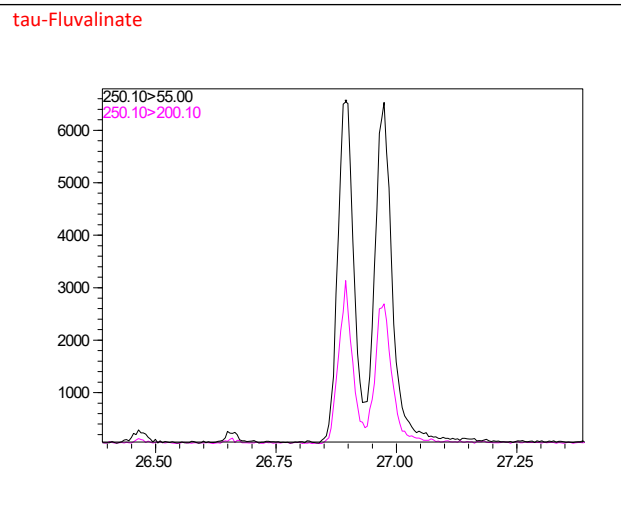

Quinalphos

Deltamethrin

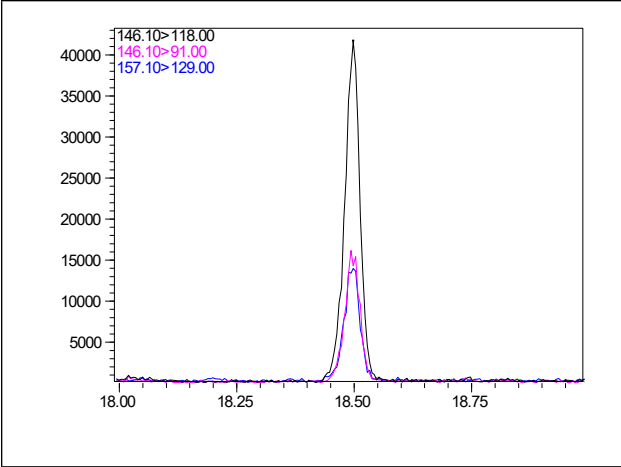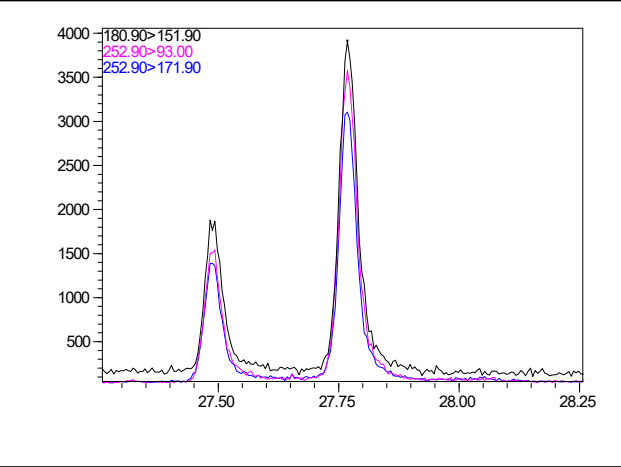

Supplement: d4ay00703d1.pdf [file d4ay00703d1.pdf]
